# Supplementary material for: In silico prediction of chronic toxicity with chemical category approaches
Source: Royal Society of Chemistry journal article supplement (doi:10.1039/c7ra08415c), 2017-01-01
Supplement: c7ra08415c1.pdf [file c7ra08415c1.pdf]

Table S1. Data sets used in the study

| Training set                                                                  |                         |
|-------------------------------------------------------------------------------|-------------------------|
| Canonical_Smiles                                                              | LOAEL<br>[mg/kg_bw/day] |
| <chem>C1C=C(Cl)C2(Cl)C3C4CC(C=C4)C3C1(Cl)C2(Cl)Cl</chem>                      | 0.01                    |
| <chem>C1C(Cl)C2(Cl)C3C4(Cl)C(Cl)(Cl)C5(Cl)C3(Cl)C1(Cl)C5(Cl)C24Cl</chem>      | 0.01                    |
| <chem>Nc1c(c(nn1c2c(Cl)cc(cc2Cl)C(F)(F)F)C#N)S(=O)C(F)(F)F</chem>             | 0.06                    |
| <chem>CNC(=O)ON=CC(C)(C)SC</chem>                                             | 0.1                     |
| <chem>CC(Oc1ccc(Oc2ncc(cc2Cl)C(F)(F)F)cc1)C(=O)O</chem>                       | 0.1                     |
| <chem>C1C1C2OC2C3C1C4(Cl)C(=C(Cl)C3(Cl)C4(Cl)Cl)Cl</chem>                     | 0.1125                  |
| <chem>CCOP(=S)(OCC)SCCSCC</chem>                                              | 0.12                    |
| <chem>CCOP(=S)(OCC)SCSCC</chem>                                               | 0.16                    |
| <chem>C1C=C(Cl)C2(Cl)C3C4CC(C5OC45)C3C1(Cl)C2(Cl)Cl</chem>                    | 0.1875                  |
| <chem>CC1CCCC(O)CCCCc2cc(O)cc(O)c2C(=O)O1</chem>                              | 0.2                     |
| <chem>S=C1NCCN1</chem>                                                        | 0.24                    |
| <chem>COP(=S)(OC)Oc1ccc(cc1)[N+](=O)[O-]</chem>                               | 0.25                    |
| <chem>CCOP(=O)(SC(C)CC)SC(C)CC</chem>                                         | 0.25                    |
| <chem>C1C1C=CC2C1C3(Cl)C(=C(Cl)C2(Cl)C3(Cl)Cl)Cl</chem>                       | 0.27                    |
| <chem>Clc1c(Cl)c(Cl)c(Cl)c1Cl</chem>                                          | 0.29                    |
| <chem>COC(=O)C=C(C)OP(=O)(OC)OC</chem>                                        | 0.35                    |
| <chem>CNC(=O)C=C(C)OP(=O)(OC)OC</chem>                                        | 0.45                    |
| <chem>CCOc1cc(OP(=S)(OC)OC)nc(CC)n1</chem>                                    | 0.45                    |
| <chem>COP(=S)(OC)Oc1ccc(c(C)c1)[N+](=O)[O-]</chem>                            | 0.46                    |
| <chem>CCOP(=S)(NC(C)C)Oc1ccccc1C(=O)OC(C)C</chem>                             | 0.5                     |
| <chem>CNC(=O)CCSCCSP(=O)(OC)OC</chem>                                         | 0.54                    |
| <chem>COP(=O)(N)SC</chem>                                                     | 0.565                   |
| <chem>C1C[n+]2ccccc2c3cccc[n+]13</chem>                                       | 0.575                   |
| <chem>C1C1C2(Cl)C3C4C5OC5C6C4C1(Cl)C(Cl)(C36)C2(Cl)Cl</chem>                  | 0.7                     |
| <chem>C1C1(Cl)C2(Cl)C3(Cl)C4(Cl)C(Cl)(Cl)C5(Cl)C(Cl)(C1(Cl)C35Cl)C24Cl</chem> | 0.7                     |
| <chem>CCOP(=S)(OCC)SCSC(C)(C)C</chem>                                         | 0.703                   |
| <chem>CCOP(=S)(OCC)SCSc1ccc(Cl)cc1</chem>                                     | 1                       |
| <chem>Clc1cccc(n1)C(Cl)(Cl)Cl</chem>                                          | 1                       |
| <chem>COC(=O)C(C)Oc1ccc(Oc2ncc(cc2Cl)C(F)(F)F)cc1</chem>                      | 1                       |
| <chem>Clc1ccccc1Nc2nc(Cl)nc(Cl)n2</chem>                                      | 1.15                    |
| <chem>CCCCSP(=O)(SCCCC)SCCCC</chem>                                           | 1.25                    |
| <chem>CCNc1nc(Cl)nc(NC(C)(C)C#N)n1</chem>                                     | 1.25                    |
| <chem>CCOP(=S)(OCC)Oc1ccc2C(=C(Cl)C(=O)Oc2c1)C</chem>                         | 1.25                    |
| <chem>C1C=C</chem>                                                            | 1.3                     |
| <chem>CCOP(=S)(OCC)Oc1ncn(n1)c2ccccc2</chem>                                  | 1.3                     |
| <chem>COC1=NN(CSP(=S)(OC)OC)C(=O)S1</chem>                                    | 1.4125                  |
| <chem>[O-][N+](=O)N1CN(CN(C1)[N+](=O)[O-])[N+](=O)[O-]</chem>                 | 1.5                     |
| <chem>CNC(=O)Oc1cc(C)c(N(C)C)c(C)c1</chem>                                    | 1.5                     |

|                                                                     |       |
|---------------------------------------------------------------------|-------|
| CCOP(=O)(OCC)OC(=CCl)c1ccc(Cl)cc1Cl                                 | 1.5   |
| COP(=O)(OC)OC=C(Cl)Cl                                               | 1.6   |
| CCOP(=O)(NC(C)C)Oc1ccc(SC)c(C)c1                                    | 1.6   |
| COP(=S)(OC)Oc1ccc(SC)c(C)c1                                         | 1.64  |
| CC(CN1CC(C)OC(C)C1)Cc2ccc(cc2)C(C)(C)C                              | 1.7   |
| COP(=S)(OC)SCN1N=Nc2ccccc2C1=O                                      | 1.73  |
| ClC1CC2C(C1Cl)C3(Cl)C(=C(Cl)C2(Cl)C3(Cl)Cl)Cl                       | 1.755 |
| CCOP(=S)(CC)Sc1ccccc1                                               | 1.94  |
| CCOP(=S)(OCC)Oc1ccc(cc1)[N+](=O)[O-]                                | 1.96  |
| COP(=O)(OC)OC(Br)C(Cl)(Cl)Br                                        | 2     |
| CCOP(=S)(OCC)SCSP(=S)(OCC)OCC                                       | 2     |
| Cc1c(cc(cc1[N+](=O)[O-])[N+](=O)[O-])[N+](=O)[O-]                   | 2     |
| CCOP(=S)(OCC)SCN1C(=O)Oc2cc(Cl)ccc12                                | 2     |
| COC(=O)Nc1nc2ccc(cc2[nH]1)S(=O)c3ccccc3                             | 2     |
| OC(c1ccc(Cl)cc1)(c2enenc2)c3ccccc3Cl                                | 2.3   |
| CC(C)C(Nc1ccc(cc1Cl)C(F)(F)F)C(=O)OC(C#N)c2cccc(Oc3ccccc3)c2        | 2.5   |
| CCOP(=S)(OCC)SC(CCl)N1C(=O)c2ccccc2C1=O                             | 2.5   |
| Clc1ccc(OS(=O)(=O)c2ccc(Cl)cc2)cc1                                  | 2.5   |
| Clc1cccc(Cl)c1C#N                                                   | 2.5   |
| CC1(C)C(C=C(Br)Br)C1C(=O)OC(C#N)c2cccc(Oc3ccccc3)c2                 | 2.5   |
| OC(c1ccc(F)cc1)(c2enenc2)c3ccccc3Cl                                 | 2.5   |
| CNC(=O)CSP(=S)(OC)OC                                                | 2.625 |
| CCCSP(=O)(OCC)SCCC                                                  | 2.7   |
| ClC1=C(Cl)C2(Cl)C3COS(=O)OCC3C1(Cl)C2(Cl)Cl                         | 2.9   |
| CC1(C)C(C(Br)C(Br)(Br)Br)C1C(=O)OC(C#N)c2cccc(Oc3ccccc3)c2          | 3     |
| COP(=S)(OC)Oc1nc(Cl)c(Cl)cc1Cl                                      | 3     |
| CCSC(=O)N(CC)C1CCCC1                                                | 3     |
| CCCCOC(=O)C(C)Oc1ccc(Oc2ccc(en2)C(F)(F)F)cc1                        | 3     |
| Cc1nn(C)c(Oc2ccccc2)c1C=NOc3ccc(cc3)C(=O)OC(C)(C)C                  | 3.08  |
| ClC1C(Cl)C(Cl)C(Cl)C(Cl)C1Cl                                        | 3.14  |
| C[n+]1ccc(cc1)c2cc[n+](C)cc2                                        | 3.15  |
| CP(=O)(O)CCC(N)C(=O)O                                               | 3.5   |
| COC(=O)N(C(=O)N1COC2(Cc3cc(Cl)ccc3C2=N1)C(=O)OC)c4ccc(OC(F)(F)F)cc4 | 3.6   |
| CSC(=O)c1c(CC(C)C)c(C(=O)SC)c(nc1C(F)F)C(F)(F)F                     | 3.63  |
| CCOP(=S)(OCC)Oc1cc(C)nc(n1)C(C)C                                    | 3.65  |
| CCOC(=O)C(C)Oc1ccc(Oc2cnc3cc(Cl)ccc3n2)cc1                          | 3.7   |
| Nc1n[nH]1                                                           | 3.75  |
| Clc1cccc(c1)c2ccccc2                                                | 4     |
| CNP(=O)(OC)Oc1ccc(cc1Cl)C(C)(C)C                                    | 4     |
| Clc1c(Cl)c(C#N)c(Cl)c(C#N)c1Cl                                      | 4     |
| Cc1cc(Cl)ccc1OCC(=O)O                                               | 4     |
| CCOC(=O)c1cn2nc(OP(=S)(OCC)OCC)cc2nc1C                              | 4     |

|                                                                 |       |
|-----------------------------------------------------------------|-------|
| CON(C)C(=O)Nc1ccc(Cl)c(Cl)c1                                    | 4.375 |
| Cc1c(F)c(F)c(COC(=O)C2C(C=C(Cl)C(F)(F)F)C2(C)C)c(F)c1F          | 4.6   |
| CCCC(O)(Cn1cnen1)c2ccc(Cl)cc2Cl                                 | 4.7   |
| Cc1c(COC(=O)C2C(C=C(Cl)C(F)(F)F)C2(C)C)cccc1c3cccc3             | 4.85  |
| CC(N)Cc1ccccc1                                                  | 5     |
| CC(C)Oe1cc(N2N=C(OC2=O)C(C)(C)C)c(Cl)cc1Cl                      | 5     |
| CNC(=O)ON=C(SC)C(=O)N(C)C                                       | 5     |
| CCN(CC)C(=O)SCc1ccc(Cl)cc1                                      | 5     |
| OC(=O)COe1ccc(Cl)cc1Cl                                          | 5     |
| FC(F)(F)c1cccc(c1)N2CC(CCl)C(Cl)C2=O                            | 5     |
| CNC(=O)Oe1cccc2CC(C)(C)Oe12                                     | 5     |
| Oe1c(Cl)cc(Cl)c(Cl)c1Cc2c(O)c(Cl)cc(Cl)c2Cl                     | 5     |
| CC1(C)CNC(=NN=C(C=Cc2ccc(cc2)C(F)(F)F)C=Cc3ccc(cc3)C(F)(F)F)NC1 | 5     |
| CCCN(CC1CC1)c2c(cc(cc2[N+](=O)[O-])C(F)(F)F)[N+](=O)[O-]        | 5     |
| ClCC=CCl                                                        | 5.1   |
| Clc1ccc(cc1)C(c2ccc(Cl)cc2)C(Cl)(Cl)Cl                          | 5.125 |
| CCNc1nc(Cl)nc(NCC)n1                                            | 5.15  |
| Nc1ccc(Cl)cc1                                                   | 5.5   |
| CCOP(=S)(OCC)Oe1nc(Cl)c(Cl)cc1Cl                                | 5.5   |
| Cc1cccc(C)c1O                                                   | 6     |
| CNC(=O)ON=C(CSC)C(C)(C)C                                        | 6     |
| CC(C)C(C(=O)OC(C#N)c1cccc(Oc2ccccc2)c1)c3ccc(OC(F)F)cc3         | 6     |
| [O-]Br(=O)=O                                                    | 6.1   |
| CN(C)C(=O)Nc1ccc(Cl)c(Cl)c1                                     | 6.125 |
| Cc1c(cc(cc1[N+](=O)[O-])[N+](=O)[O-])C(=O)N                     | 6.25  |
| CCCN(CCOe1c(Cl)cc(Cl)cc1Cl)C(=O)n2ccnc2                         | 6.3   |
| Clc1ccc(c(Cl)c1)C2(Cn3cnen3)CC(Br)CO2                           | 6.48  |
| CCN(CC)C(=O)C=C(C)OP(=O)(OC)OC)Cl                               | 6.9   |
| CC(C)NCC(O)COe1cccc2[nH]c3ccccc3c12                             | 7     |
| Cc1ccc2nc3SC(=O)Sc3nc2c1                                        | 7.5   |
| Fc1cccc(F)c1C(=O)NC(=O)Nc2ccc(Cl)cc2                            | 7.6   |
| CCCC(Cn1cnen1)(C#N)c2ccc(Cl)cc2                                 | 7.9   |
| Cc1ccc(cc1N)[N+](=O)[O-]                                        | 8     |
| O=C1C2=C(SC(=C(S2)C#N)C#N)C(=O)c3ccccc13                        | 8     |
| CCN(CC)c1nc(C)cc(OP(=S)(OC)OC)n1                                | 8.15  |
| CCSC(=O)N1CCCCC1                                                | 8.405 |
| CC(Oe1cc(Cl)c(Cl)cc1Cl)C(=O)O                                   | 8.7   |
| CC(C)N1C(=NC(C)(C)C)SCN(C1=O)c2ccccc2                           | 8.7   |
| CC(C)OC(=O)C(O)(c1ccc(Cl)cc1)c2ccc(Cl)cc2                       | 9     |
| CC(Oe1ccc(Cl)cc1Cl)C(=O)O                                       | 9     |
| CCOC(=O)C(C)Oe1ccc(Oe2oc3cc(Cl)ccc3n2)cc1                       | 9     |
| CON(C(=O)OC)c1cccc1COc2ccn(n2)c3ccc(Cl)cc3                      | 9     |

|                                                                        |        |
|------------------------------------------------------------------------|--------|
| <chem>CNC(=O)Oc1cc(C)c(SC)c(C)c1</chem>                                | 9.3    |
| <chem>CC1(C)C(C=C(Cl)Cl)C1C(=O)OC(C#N)c2ccc(F)c(Oc3ccccc3)c2</chem>    | 9.5    |
| <chem>CN(C=Nc1ccc(C)cc1C)C=Nc2ccc(C)cc2C</chem>                        | 9.9    |
| <chem>CC1=C(C)S(=O)(=O)CCS1(=O)=O</chem>                               | 10     |
| <chem>Oc1c(Cl)c(Cl)c(Cl)c(Cl)c1Cl</chem>                               | 10     |
| <chem>OC(=O)COc1cc(Cl)c(Cl)cc1Cl</chem>                                | 10     |
| <chem>CSC(=NOC(=O)N(C)SN(C)C(=O)ON=C(C)SC)C</chem>                     | 10     |
| <chem>Clc1ccc(c(Cl)c1)C2(Cn3en3)OCCO2</chem>                           | 10     |
| <chem>CNC(=O)Oc1cc(C)c(C)c(C)c1</chem>                                 | 10     |
| <chem>CCOC(=O)NCCOc1ccc(Oc2ccccc2)cc1</chem>                           | 10     |
| <chem>Cc1cc(C(C#N)c2ccc(Cl)cc2)c(Cl)cc1NC(=O)c3cc(I)cc(I)c3O</chem>    | 10     |
| <chem>Clc1ccccc1c2nnc(n2)c3ccccc3Cl</chem>                             | 10.125 |
| <chem>CN(C)C(=S)SSC(=S)N(C)C</chem>                                    | 11     |
| <chem>OC(c1ccc(Cl)cc1)(c2ccc(Cl)cc2)C(Cl)(Cl)Cl</chem>                 | 11.25  |
| <chem>CCCSP(=S)(OCC)Oc1ccc(SC)cc1</chem>                               | 11.5   |
| <chem>CCNc1cc2[o+]c3cc(NCC)c(C)cc3c(c4ccccc4C(=O)OCC)c2cc1C</chem>     | 12     |
| <chem>CCOC(=O)C(Cl)Cc1cc(N2N=C(C)N(C(F)F)C2=O)c(F)cc1Cl</chem>         | 12     |
| <chem>CCOc1ccc2NC(C)(C)C=C(C)c2c1</chem>                               | 12     |
| <chem>CC(C)C(O)(c1ccc(OC(F)(F)F)cc1)c2cncnc2</chem>                    | 12.1   |
| <chem>CN(C)C(=O)Oc1nc(nc(C)c1C)N(C)C</chem>                            | 12.4   |
| <chem>CNC(=O)Oc1cccc(c1)N=CN(C)C</chem>                                | 12.5   |
| <chem>CC(C)N(C(C)C)C(=O)SCC(=C(Cl)Cl)Cl</chem>                         | 12.5   |
| <chem>CCOC(=O)CN1C(=O)Sc2ccccc(Cl)c12</chem>                           | 12.5   |
| <chem>CON(C)C(=O)Nc1ccc(Br)cc1</chem>                                  | 12.5   |
| <chem>COC(=O)c1ccccc1S(=O)(=O)NC(=O)N(C)c2nc(C)nc(OC)n2</chem>         | 12.5   |
| <chem>CCN(CC(=C)C)c1c(cc(cc1[N+](=O)[O-])C(F)(F)F)[N+](=O)[O-]</chem>  | 12.5   |
| <chem>CCOP(=S)(OCC)Oc1nc(Cl)n(n1)C(C)C</chem>                          | 12.5   |
| <chem>CC1(C)C(C=C(Cl)C(F)(F)F)C1C(=O)OC(C#N)c2cccc(Oc3ccccc3)c2</chem> | 12.5   |
| <chem>[O-][N+](=O)c1cc(cc(c1)[N+](=O)[O-])[N+](=O)[O-]</chem>          | 13.31  |
| <chem>ClC(Cl)C(Cl)(Cl)SN1C(=O)C2CC=CCC2C1=O</chem>                     | 13.5   |
| <chem>CCOCn1c(c2ccc(Cl)cc2)c(C#N)c(Br)c1C(F)(F)F</chem>                | 13.6   |
| <chem>Cc1ccc(O)cc1C</chem>                                             | 14     |
| <chem>ClC(=C)Cl</chem>                                                 | 14     |
| <chem>CCc1cccc(CC)c1N(COC)C(=O)CCl</chem>                              | 14.5   |
| <chem>COP(=S)(OC)SCN1C(=O)c2ccccc2C1=O</chem>                          | 14.5   |
| <chem>Nc1nc(N)nc(NC2CC2)n1</chem>                                      | 15     |
| <chem>COC(=O)Nc1nc2ccc(Sc3ccccc3)cc2[nH]1</chem>                       | 15     |
| <chem>CSC1=NN=C(C(=O)N1N)C(C)(C)C</chem>                               | 15     |
| <chem>CCNc1nc(NC(C)(C)C)nc(SC)n1</chem>                                | 15     |
| <chem>CC12CC1(C)C(=O)N(C2=O)c3cc(Cl)cc(Cl)c3</chem>                    | 15     |
| <chem>CC(C)OP(=S)(OC(C)C)SCCNS(=O)(=O)c1ccccc1</chem>                  | 15     |
| <chem>CN(C)C(=O)Nc1cccc(c1)C(F)(F)F</chem>                             | 15     |
| <chem>CCOc1cc(Oc2ccc(cc2Cl)C(F)(F)F)ccc1[N+](=O)[O-]</chem>            | 15     |

|                                                                                                          |        |
|----------------------------------------------------------------------------------------------------------|--------|
| <chem>CNC(=O)ON=C(C)SC</chem>                                                                            | 15     |
| <chem>Cc1ncc([N+](=O)[O-])n1C</chem>                                                                     | 15     |
| <chem>CC(C)(C)C(O)(CCc1ccc(Cl)cc1)Cn2cn2</chem>                                                          | 15.9   |
| <chem>CCCC(=NOCC)C1C(=O)CC(CC(C)SCC)CC1=O</chem>                                                         | 16.56  |
| <chem>CC(CN1c2ccccc2Sc3ccccc13)N(C)C</chem>                                                              | 16.6   |
| <chem>CC1(OC(=O)N(Nc2ccccc2)C1=O)c3ccc(Oc4ccccc4)cc3</chem>                                              | 16.8   |
| <chem>CCCN(CCC)C(=O)SCC</chem>                                                                           | 17     |
| <chem>[O-][N+](=O)NC1=NCCN1Cc2ccc(Cl)nc2</chem>                                                          | 17     |
| <chem>CN(C)S(=O)(=O)N(SC(F)(Cl)Cl)c1ccc(C)cc1</chem>                                                     | 18     |
| <chem>CCOC(=O)C(O)(c1ccc(Cl)cc1)c2ccc(Cl)cc2</chem>                                                      | 18.4   |
| <chem>COP(=O)(NC(=O)C)SC</chem>                                                                          | 18.75  |
| <chem>NC(=NCCCCCCCCNCCCCCCCCN=C(N)N)N</chem>                                                             | 19     |
| <chem>Clc1ccc(cc1)C(C#N)c2c(Cl)ccc(N3N=CC(=O)NC3=O)c2Cl</chem>                                           | 19     |
| <chem>CC(Cl)(Cl)C(=O)O</chem>                                                                            | 19.085 |
| <chem>CC(C)C1(C)N=C(NC1=O)c2nc3ccccc3cc2C(=O)O</chem>                                                    | 20     |
| <chem>CS(=O)(=O)c1cc(ccc1C(=O)c2enoc2C3CC3)C(F)(F)F</chem>                                               | 20     |
| <chem>COP(=O)(OC)C(O)C(Cl)(Cl)Cl</chem>                                                                  | 20     |
| <chem>CCCSelccc2nc(NC(=O)OC)[nH]c2c1</chem>                                                              | 20     |
| <chem>CC1(C)CON(Cc2ccccc2Cl)C1=O</chem>                                                                  | 21.5   |
| <chem>Nc1nc(NC2CC2)nc(N)c1C#N</chem>                                                                     | 22     |
| <chem>CC1(C)C(C(=O)OC(C#N)c2ccccc(Oc3ccccc3)c2)C1(C)C</chem>                                             | 22.225 |
| <chem>CC(C)N(C(=O)CCl)c1ccccc1</chem>                                                                    | 23     |
| <chem>CCC1CCCC(OC2CCC(C(C)O2)N(C)C)C(C)C(=O)C3CC4C(CCC5CC(CCC45)OC6CC(C)C(OC)C(OC)C6OC)C3CC(=O)O1</chem> | 24     |
| <chem>c1ccc2[nH]c(nc2c1)c3cscn3</chem>                                                                   | 24     |
| <chem>COc1nc(C)nc(NC(=O)NS(=O)(=O)c2ccccc2Cl)n1</chem>                                                   | 25     |
| <chem>Nc1ccc(O)c(N)c1</chem>                                                                             | 25     |
| <chem>COC(=O)c1sccc1S(=O)(=O)NC(=O)Nc2nc(C)nc(OC)n2</chem>                                               | 25     |
| <chem>CC1(C)C(C=C(Cl)Cl)C1C(=O)OCc2ccccc(Oc3ccccc3)c2</chem>                                             | 25     |
| <chem>COC(=O)Nc1ccc(OC(=O)Nc2ccccc(C)c2)c1</chem>                                                        | 25     |
| <chem>CCOC(=O)COC(=O)c1cc(Oc2ccc(cc2Cl)C(F)(F)F)ccc1[N+](=O)[O-]</chem>                                  | 25     |
| <chem>CC(C)(C)C(O)C(Oc1ccc(cc1)c2ccccc2)n3cn2n3</chem>                                                   | 25     |
| <chem>CCCCC1=C(C)NC(=NC1=O)NCC</chem>                                                                    | 25     |
| <chem>Clc1ccc(CN(C2CCCC2)C(=O)Nc3ccccc3)cc1</chem>                                                       | 25     |
| <chem>CC(C)C(C(=O)OC(C#N)c1ccccc(Oc2ccccc2)c1)c3ccc(Cl)cc3</chem>                                        | 25     |
| <chem>CC(C)c1cc(ccc1O)C(C)(C)c2ccc(O)c(c2)C(C)C</chem>                                                   | 25     |
| <chem>CCCCN(CCCC)SN(C)C(=O)Oe1ccccc2CC(C)(C)Oe12</chem>                                                  | 25     |
| <chem>CCNc1nc(Cl)nc(NC(C)C)n1</chem>                                                                     | 25     |
| <chem>Fe1ccccc(F)c1C(=O)NC(=O)Nc2cc(Cl)c(F)c(Cl)c2F</chem>                                               | 25.5   |
| <chem>CC(C)OC(=O)C(O)(c1ccc(Br)cc1)c2ccc(Br)cc2</chem>                                                   | 26     |
| <chem>CCOc1ccc(cc1)C(C)(C)COCc2ccccc(Oc3ccccc3)c2</chem>                                                 | 26     |
| <chem>CCN1CCN(CC1)c2cc3N(C=C(C(=O)O)C(=O)c3cc2F)C4CC4</chem>                                             | 26     |
| <chem>CC(C)(C)C(=O)C(Oc1ccc(Cl)cc1)n2cn2</chem>                                                          | 26.585 |

|                                                                          |       |
|--------------------------------------------------------------------------|-------|
| <chem>Clc1ccc(C(Cn2ccnc2)OCC=C)c(Cl)c1</chem>                            | 27.5  |
| <chem>CC(=O)Nc1cc(NS(=O)(=O)C(F)(F)F)c(C)cc1C</chem>                     | 27.6  |
| <chem>N(c1ccccc1)c2ccccc2</chem>                                         | 28    |
| <chem>CCCC(=C1C(=O)CC(CC1=O)C2CCCSC2)NOCC</chem>                         | 28    |
| <chem>ClC(Br)Br</chem>                                                   | 28.5  |
| <chem>CN1C=C(C(=O)C(=C1)c2ccccc2)C(F)(F)F)c3ccccc3</chem>                | 28.75 |
| <chem>CC(=O)OCCCCCCCCCCCCNC(=N)N</chem>                                  | 29    |
| <chem>CCCN(CCC)c1c(cc(c(N)c1[N+](=O)[O-])C(F)(F)F)[N+](=O)[O-]</chem>    | 29.4  |
| <chem>CC1=C(SCCO1)C(=O)Nc2ccccc2</chem>                                  | 30    |
| <chem>OC(=O)CCl</chem>                                                   | 30    |
| <chem>CN(C)C(=O)C(c1ccccc1)c2ccccc2</chem>                               | 30    |
| <chem>O=C(Nc1ccccc1)Nc2cnns2</chem>                                      | 30    |
| <chem>Clc1cc(Cl)cc(c1)C2(CC(Cl)(Cl)Cl)CO2</chem>                         | 30    |
| <chem>CN1CSC(=S)N(C)C1</chem>                                            | 30    |
| <chem>CCNC(=O)NC(=O)C(=NOC)C#N</chem>                                    | 30.3  |
| <chem>Cc1cccc2sc3nncn3c12</chem>                                         | 31    |
| <chem>COC(=O)NC(=S)Nc1ccccc1NC(=S)NC(=O)OC</chem>                        | 32    |
| <chem>Cc1cc(C)nc(NS(=O)(=O)c2ccc(N)cc2)n1</chem>                         | 33    |
| <chem>Cc1ccc(cc1[N+](=O)[O-])[N+](=O)[O-]</chem>                         | 34    |
| <chem>CNC1=C(Cl)C(=O)N(N=C1)c2ccccc2)C(F)(F)F</chem>                     | 35    |
| <chem>Clc1ccc(CCC(Cn2cncn2)(C#N)c3ccccc3)cc1</chem>                      | 35    |
| <chem>Cc1cc(nc(Nc2ccccc2)n1)C3CC3</chem>                                 | 35.6  |
| <chem>OC(=O)COc1nc(Cl)c(Cl)cc1Cl</chem>                                  | 36    |
| <chem>FC(OC(F)(F)F)C(F)(F)Oe1ccc(NC(=O)NC(=O)c2c(F)cccc2F)cc1Cl</chem>   | 36    |
| <chem>CC(C)N1C(=O)c2ccccc2NS1(=O)=O</chem>                               | 37.5  |
| <chem>CC(=CC1C(C(=O)OC2CC(=O)C(=C2C)CC=C)C1(C)C)C</chem>                 | 37.77 |
| <chem>CNC(=O)Oe1ccc2ccccc12</chem>                                       | 37.8  |
| <chem>CC(C)(C)C(O)C(=Cc1ccc(Cl)cc1)n2cncn2</chem>                        | 39.41 |
| <chem>CNC(=O)N(C)c1nnc(s1)C(C)(C)C</chem>                                | 40    |
| <chem>COCC(=O)Nc1ccc(Sc2ccccc2)ccc1NC(=NC(=O)OC)NC(=O)OC</chem>          | 40    |
| <chem>CC(C)N(C(C)C)c1c(cc(cc1[N+](=O)[O-])S(=O)(=O)N)[N+](=O)[O-]</chem> | 40.93 |
| <chem>COC(=O)c1c(CC(C)C)c(C2=NCCS2)c(nc1C(F)F)C(F)(F)F</chem>            | 44.2  |
| <chem>CON=C(Cc1ccnc1)c2ccc(Cl)cc2Cl</chem>                               | 45    |
| <chem>CCC(C)(O)C#C</chem>                                                | 46    |
| <chem>COC(C)(C)CCCC(C)CC=CC(=CC(=O)OC(C)C)C</chem>                       | 46    |
| <chem>CC(C)NC(=O)N1CC(=O)N(C1=O)c2cc(Cl)cc(Cl)c2</chem>                  | 46    |
| <chem>COC(=O)C(C)N(C(=O)Cc1ccccc1)c2c(C)cccc2C</chem>                    | 46    |
| <chem>COe1ccc(cc1OC)C(=CC(=O)N2CCOCC2)c3ccc(Cl)cc3</chem>                | 46.3  |
| <chem>Nc1ccc2cc3ccc(N)cc3nc2c1</chem>                                    | 47    |
| <chem>CCc1ccc(cc1)C(=O)NN(C(=O)c2cc(C)cc(C)c2)C(C)(C)C</chem>            | 48    |
| <chem>CCC(=O)Nc1ccc(Cl)c(Cl)c1</chem>                                    | 48    |
| <chem>CCOCN(C(=O)CCl)c1c(C)cccc1CC</chem>                                | 50    |
| <chem>CNC(=O)Oe1ccccc1OC(C)C</chem>                                      | 50    |

|                                                                                                          |       |
|----------------------------------------------------------------------------------------------------------|-------|
| <chem>CN(C)C1=NC(=O)N(C2CCCC2)C(=O)N1C</chem>                                                            | 50    |
| <chem>COP(=S)(OC)Oe1cc(Cl)c(Cl)cc1Cl</chem>                                                              | 50    |
| <chem>CC(C)Nc1nc(Cl)nc(NC(C)C)n1</chem>                                                                  | 50    |
| <chem>COC(=O)c1ccc(C)cc1C2=NC(C)(C(C)C)C(=O)N2</chem>                                                    | 50    |
| <chem>IC(=C(I)I)I</chem>                                                                                 | 50    |
| <chem>CN1CC(O)N(C1=O)c2nnc(s2)C(C)(C)C</chem>                                                            | 50    |
| <chem>CC(C)(C)C(O)C(=Cc1ccc(Cl)cc1Cl)n2cnen2</chem>                                                      | 50    |
| <chem>COCC(=O)N(N1CCOC1=O)c2c(C)cccc2C</chem>                                                            | 50    |
| <chem>CCC(C)Nc1c(cc(cc1[N+](=O)[O-])C(C)(C)C)[N+](=O)[O-]</chem>                                         | 50    |
| <chem>CS(=O)(=O)NC(=O)c1cc(Oc2ccc(cc2Cl)C(F)(F)F)ccc1[N+](=O)[O-]</chem>                                 | 50    |
| <chem>CCN(Cc1c(F)cccc1Cl)c2c(cc(cc2[N+](=O)[O-])C(F)(F)F)[N+](=O)[O-]</chem>                             | 50    |
| <chem>CCOC(=O)CN(C(=O)CC)c1c(CC)cccc1CC</chem>                                                           | 50    |
| <chem>CCOC(=O)C(C)OC(=O)c1cc(Oc2ccc(cc2Cl)C(F)(F)F)ccc1[N+](=O)[O-]</chem>                               | 50    |
| <chem>CC(C)(c1ccc(O)cc1)c2ccc(O)cc2</chem>                                                               | 50    |
| <chem>CCOC(=O)C(C)OC(=O)c1cc(Oc2cc(ccc2Cl)C(F)(F)F)ccc1[N+](=O)[O-]</chem>                               | 50    |
| <chem>CN1CC2CC1CN2c3cc4N(C=C(C(=O)O)C(=O)c4cc3F)C5CC5</chem>                                             | 50    |
| <chem>CCC(C)(CC)c1cc(NC(=O)c2c(OC)cccc2OC)on1</chem>                                                     | 50.7  |
| <chem>CICCl</chem>                                                                                       | 51.29 |
| <chem>CCCCCCCCc1cc(c(OC(=O)C=CC)c(c1)[N+](=O)[O-])[N+](=O)[O-]</chem>                                    | 57    |
| <chem>CNC(=O)Oe1cc(C)cc(C)c1C</chem>                                                                     | 59.2  |
| <chem>NC1CCCCC1</chem>                                                                                   | 59.25 |
| <chem>CC(C)(C)c1ccc(OC2CCCC2OS(=O)OCC#C)cc1</chem>                                                       | 59.5  |
| <chem>O=Cc1occc1</chem>                                                                                  | 60    |
| <chem>Nc1c(Cl)c(Cl)nc(C(=O)O)c1Cl</chem>                                                                 | 60    |
| <chem>ClC(Cl)Cl</chem>                                                                                   | 60    |
| <chem>CON=C(C(=O)OC)c1cccc1CON=C(C)c2cccc(c2)C(F)(F)F</chem>                                             | 60    |
| <chem>CCCC1COC(Cn2cnen2)(O1)c3ccc(Cl)cc3Cl</chem>                                                        | 60.5  |
| <chem>COC=C(C(=O)OC)c1cccc1Oc2cc(Oc3ccccc3C#N)n2</chem>                                                  | 62.25 |
| <chem>COCC(=O)N(C(C)C(=O)OC)c1c(C)cccc1C</chem>                                                          | 62.5  |
| <chem>CCC(C)N1C(=O)NC(=C(Br)C1=O)C</chem>                                                                | 62.5  |
| <chem>CCc1cccc(CC)c1N(CNC(=O)C)C(=O)CCl</chem>                                                           | 62.5  |
| <chem>CC1(C)C(C=C(Cl)Cl)C1C(=O)OC(C#N)c2cccc(Oc3ccccc3)c2</chem>                                         | 62.5  |
| <chem>Cc1cc(C)c(N)cc1C</chem>                                                                            | 63    |
| <chem>CC(C)(C)C(O)C(Oc1ccc(Cl)cc1)n2cnen2</chem>                                                         | 65    |
| <chem>CC1=NN(C(=O)N1C(F)F)c2cc(NS(=O)(=O)C)c(Cl)cc2Cl</chem>                                             | 67    |
| <chem>CCCCCCCCSC(=O)Oe1cc(Cl)nnc1c2cccc2</chem>                                                          | 67.5  |
| <chem>CIC#N</chem>                                                                                       | 70    |
| <chem>CC1CC=CC=CC=CC=CC(CC2(C)OC(O)(CC(O)CC3(C)OC3C=CC(=O)O1)CC(O)C2C(=O)O)OC4(C)OC(C)C(O)C(N)C4O</chem> | 72    |
| <chem>Fe1ccc(cc1)C(=O)CCCN2CCN(CC2)c3cccn3</chem>                                                        | 72.5  |
| <chem>CC1(OC(=O)N(C1=O)c2cc(Cl)cc(Cl)c2)C=C</chem>                                                       | 72.9  |

|                                                                      |       |
|----------------------------------------------------------------------|-------|
| <chem>NC(=N)NC(=N)NCCc1ccccc1</chem>                                 | 73    |
| <chem>COP(=O)(OC)OC(=CCl)c1cc(Cl)c(Cl)cc1Cl</chem>                   | 75    |
| <chem>COC(=O)Nc1nc2ccccc2[nH]1</chem>                                | 75    |
| <chem>NCCNc1ccccc2ccccc12</chem>                                     | 79    |
| <chem>COc1nc(C)nc(NC(=O)NS(=O)(=O)c2ccccc2CCC(F)(F)F)n1</chem>       | 79.9  |
| <chem>Cc1cc(C)nc(NC(=O)NS(=O)(=O)c2ccccc2C(=O)OC3COC3)n1</chem>      | 83    |
| <chem>Nc1ccc(N)c(c1)[N+](=O)[O-]</chem>                              | 87    |
| <chem>CCSC(C)CC1CC(=O)C(=C(CC)NOCC=CCl)C(=O)C1</chem>                | 93    |
| <chem>CC(=CC1C(C(=O)OC2CC(=O)C(=C2C)CC#C)C1(C)C)C</chem>             | 95    |
| <chem>COP(=O)OC</chem>                                               | 100   |
| <chem>CC(Oc1ccccc(Cl)c1)C(=O)O</chem>                                | 100   |
| <chem>ClC(Cl)(Cl)SN1C(=O)C2CC=CCC2C1=O</chem>                        | 100   |
| <chem>CCN(CC)C(=O)C(C)Oc1ccccc2ccccc12</chem>                        | 100   |
| <chem>CCSC(=O)N(CC(C)C)CC(C)C</chem>                                 | 100   |
| <chem>ClC(Cl)(Cl)C(NC=O)N1CCN(CC1)C(NC=O)C(Cl)(Cl)Cl</chem>          | 100   |
| <chem>OC(=O)c1cc(Oc2ccc(cc2Cl)C(F)(F)F)ccc1[N+](=O)[O-]</chem>       | 102.5 |
| <chem>ClC(Cl)C(Cl)Cl</chem>                                          | 108   |
| <chem>FC1(F)Oc2ccccc(c2O1)c3c[nH]cc3C#N</chem>                       | 110   |
| <chem>OC(=O)C1C2CCC(O2)C1C(=O)O</chem>                               | 115   |
| <chem>COc1c(Cl)ccc(Cl)c1C(=O)O</chem>                                | 115   |
| <chem>Clc1ccccc1</chem>                                              | 120   |
| <chem>BrC#N</chem>                                                   | 122   |
| <chem>CC1CC(OC(=O)C)OC(C)O1</chem>                                   | 125   |
| <chem>C[n+]1c(cc(c2ccccc2)n1C)c3ccccc3</chem>                        | 125   |
| <chem>COc1ccc(cc1)C(c2ccc(OC)cc2)C(Cl)(Cl)Cl</chem>                  | 125   |
| <chem>CN(C)C(=O)Nc1ccc(Cl)cc1</chem>                                 | 125   |
| <chem>CC(=CC1C(C(=O)OCc2coc(Cc3ccccc3)c2)C1(C)C)C</chem>             | 125   |
| <chem>COc1cc(Cl)c(OC)cc1Cl</chem>                                    | 125   |
| <chem>COC(=O)c1ccc(cc1)C(=O)OC</chem>                                | 125   |
| <chem>O=C1CCCCCN1</chem>                                             | 125   |
| <chem>CCOC(=O)c1ccccc1S(=O)(=O)NC(=O)Nc2nc(Cl)cc(OC)n2</chem>        | 125   |
| <chem>CCCCOCC(C)OCC(C)O</chem>                                       | 128   |
| <chem>ClC(Cl)Br</chem>                                               | 130   |
| <chem>[O-][N+](=O)c1c(Cl)c(Cl)c(Cl)c(Cl)c1Cl</chem>                  | 132.5 |
| <chem>OC(O)C(Cl)(Cl)Cl</chem>                                        | 135   |
| <chem>COC(=O)c1ccccc1S(=O)(=O)NC(=O)Nc2nc(OC(F)F)cc(OC(F)F)n2</chem> | 140   |
| <chem>CC(COc1ccc(Oc2ccccc2)cc1)Oc3ccccc3</chem>                      | 140   |
| <chem>Oc1ccccc2ccnc12</chem>                                         | 143   |
| <chem>COC(=O)C(Cc1ccccc1)NC(=O)C(N)CC(=O)O</chem>                    | 147   |
| <chem>FC(F)(Cl)Cl</chem>                                             | 150   |
| <chem>C[N+](C)CCCC1</chem>                                           | 150   |
| <chem>COC(=O)C1(O)c2ccccc2c3ccc(Cl)cc13</chem>                       | 150   |
| <chem>CCc1ccccc(C)c1N(C(C)COC)C(=O)CCl</chem>                        | 150   |



|                                                                                |        |
|--------------------------------------------------------------------------------|--------|
| <chem>CC(C)C12CCC(C)(O1)C(C2)OCc3ccccc3C</chem>                                | 150    |
| <chem>CC(=CC1C(C(=O)OCe2ccccc(Oc3ccccc3)c2)C1(C)C)C</chem>                     | 150    |
| <chem>Cc1ncc([N+](=O)[O-])n1CCO</chem>                                         | 150    |
| <chem>CN(C)C1C2CC3C(=C(O)c4c(O)cccc4C3(C)O)C(=O)C2(O)C(=O)C(=C(N)O)C1=O</chem> | 150    |
| <chem>CC1C(SC(=O)N1C(=O)NC2CCCCC2)c3ccc(Cl)cc3</chem>                          | 160    |
| <chem>[O-][N+](=O)c1ccccc2ccccc12</chem>                                       | 165    |
| <chem>CCOC(=O)C1OC1(C)c2ccccc2</chem>                                          | 175    |
| <chem>CCCCOCCOCCOCc1cc2OCOc2cc1CCC</chem>                                      | 175    |
| <chem>CC1=CC(=O)CC(C)(C)C1</chem>                                              | 179    |
| <chem>COC(=O)NS(=O)(=O)c1ccc(N)cc1</chem>                                      | 180    |
| <chem>Oc1ccc2cc(ccc2c1N=Nc3ccccc3)S(=O)(=O)O</chem>                            | 180    |
| <chem>Cc1cc(N)ccc1NOS(=O)(=O)O</chem>                                          | 184    |
| <chem>Nc1c(Cl)cc(cc1Cl)[N+](=O)[O-]</chem>                                     | 195    |
| <chem>ClC(Cl)(Cl)SN1C(=O)c2ccccc2C1=O</chem>                                   | 196    |
| <chem>CCCCC(CC)COC(=O)c1ccccc1C(=O)OCC(CC)CCCC</chem>                          | 200    |
| <chem>CCCN(CCCl)c1c(cc(cc1[N+](=O)[O-])C(F)(F)F)[N+](=O)[O-]</chem>            | 202.4  |
| <chem>OP(=O)(O)CCCl</chem>                                                     | 202.67 |
| <chem>CCOC(=O)CC(SP(=S)(OC)OC)C(=O)OCC</chem>                                  | 205    |
| <chem>CCCCNC(=O)n1c(NC(=O)OC)nc2ccccc12</chem>                                 | 215    |
| <chem>CC(C)(C)c1ccc(O)c(Cl)c1</chem>                                           | 216    |
| <chem>COc1nc(C)nc(NC(=O)NS(=O)(=O)c2ccccc2OCCCl)n1</chem>                      | 220.8  |
| <chem>CC(C)(C)c1cc(O)ccc1O</chem>                                              | 225    |
| <chem>OCCNc1ccc(cc1OCCO)[N+](=O)[O-]</chem>                                    | 229    |
| <chem>Clc1ccc(cc1)S(=O)(=O)c2cc(Cl)c(Cl)cc2Cl</chem>                           | 230    |
| <chem>C=Cc1ccccc1</chem>                                                       | 235.33 |
| <chem>CCOC(=O)C=C</chem>                                                       | 248    |
| <chem>CC(=C)C(=O)O</chem>                                                      | 248    |
| <chem>c1ccc(cc1)c2ccccc2</chem>                                                | 250    |
| <chem>CC(=CC1C(C(=O)OCN2C(=O)C3=C(CCCC3)C2=O)C1(C)C)C</chem>                   | 250    |
| <chem>CCCOC(=O)c1ccc(nc1)C(=O)OCCC</chem>                                      | 250    |
| <chem>NCC(O)c1ccc(O)cc1</chem>                                                 | 250    |
| <chem>COC(=O)c1ccccc1S(=O)(=O)NC(=O)Nc2nc(C)nc(OC)n2</chem>                    | 250    |
| <chem>COC(=O)c1c(Cl)c(Cl)c(C(=O)OC)c(Cl)c1Cl</chem>                            | 255    |
| <chem>C[N+](C)(C)CCCl</chem>                                                   | 262.5  |
| <chem>COc1ccc(N)c(OC)c1</chem>                                                 | 276    |
| <chem>CC1(CCCCC1)C(=O)Nc2ccc(O)c(Cl)c2Cl</chem>                                | 292    |
| <chem>Clc1ccc(Cl)cc1</chem>                                                    | 300    |
| <chem>COC(=O)c1ccccc1CS(=O)(=O)NC(=O)Nc2nc(OC)cc(OC)n2</chem>                  | 309    |
| <chem>Oc1ccccc1</chem>                                                         | 344    |
| <chem>COc1ccc(C=CC)cc1</chem>                                                  | 344    |
| <chem>FC(Cl)(Cl)Cl</chem>                                                      | 349    |
| <chem>CCc1ccccc1</chem>                                                        | 349.5  |

|                                                                                                                |          |
|----------------------------------------------------------------------------------------------------------------|----------|
| <chem>COC(=O)c1cccc1O</chem>                                                                                   | 360      |
| <chem>CON=C(C(=O)OC)c1cccc1COc2cccc2C</chem>                                                                   | 372.5    |
| <chem>CC(C)Oc1cccc(NC(=O)c2cccc2C(F)(F)F)c1</chem>                                                             | 387.5    |
| <chem>CC(C)c1cccc1</chem>                                                                                      | 396.5    |
| <chem>CCOP(=O)O</chem>                                                                                         | 400      |
| <chem>CC1CCc2cc(F)cc3C(=O)C(=CN1c23)C(=O)O</chem>                                                              | 400      |
| <chem>COc1cccc(C(=O)NN(C(=O)c2cc(C)cc(C)c2)C(C)(C)C)c1C</chem>                                                 | 411      |
| <chem>ClCC#CCOC(=O)Nc1cccc(Cl)c1</chem>                                                                        | 450      |
| <chem>CCCCOC(=O)c1cccc1C(=O)OCc2cccc2</chem>                                                                   | 470      |
| <chem>COc1ccc(N)cc1</chem>                                                                                     | 474      |
| <chem>COC(=O)C(=CC=CC(=CC=CC=C(C)C=CC=C(C)C=CC1=C(C)CCCC1(C)C)C</chem>                                         | 500      |
| <chem>CC(CCC(=O)O)C1CCC2C3CCC4CC(O)CCC4(C)C3CCC12C</chem>                                                      | 500      |
| <chem>Nc1c(Cl)c(F)nc(OCC(=O)O)c1Cl</chem>                                                                      | 500      |
| <chem>C(Oc1cccc1c2cccc2)C3CO3</chem>                                                                           | 500      |
| <chem>CC(C)C1(C)N=C(NC1=O)c2ncccc2C(=O)O</chem>                                                                | 500      |
| <chem>O=C1NNC(=O)C=C1</chem>                                                                                   | 500      |
| <chem>CC(C)N(C(C)C)c1c(cc(cc1[N+](=O)[O-])C(F)(F)F)[N+](=O)[O-]</chem>                                         | 520      |
| <chem>CC(C)C1CCC(C)CC1O</chem>                                                                                 | 593      |
| <chem>CCCCOC(=O)c1cccc1C(=O)OCCCC</chem>                                                                       | 600      |
| <chem>OC(=O)CNCP(=O)(O)O</chem>                                                                                | 650      |
| <chem>CCCOC(=O)NCCCN(C)C</chem>                                                                                | 680      |
| <chem>Nc1ccc(O)cc1</chem>                                                                                      | 686      |
| <chem>CCN(Cc1cccc(c1)S(=O)(=O)O)c2ccc(cc2)C(=C3C=CC(=[N+](CC)Cc4cccc(c4)S(=O)(=O)O)C=C3)c5ccc(cc5)N(C)C</chem> | 720      |
| <chem>OCc1cc(N=Nc2ccc(c3cccc23)S(=O)(=O)O)c(O)c(N=Nc4ccc(c5cccc45)S(=O)(=O)O)c1O</chem>                        | 736      |
| <chem>S=C1Nc2cccc2S1</chem>                                                                                    | 750      |
| <chem>CC(C)OC(=O)Nc1cccc(Cl)c1</chem>                                                                          | 750      |
| <chem>OC(=O)c1c(Cl)ccc2cc(Cl)nc12</chem>                                                                       | 757      |
| <chem>NC(=O)c1cncn1</chem>                                                                                     | 789      |
| <chem>OCCO</chem>                                                                                              | 803.335  |
| <chem>CCCOC(=O)c1cc(O)c(O)c(O)c1</chem>                                                                        | 864      |
| <chem>O=C1CCCCC1</chem>                                                                                        | 910      |
| <chem>NC(=S)NNC(=S)N</chem>                                                                                    | 947      |
| <chem>Oc1cccc1c2cccc2</chem>                                                                                   | 1000     |
| <chem>OC(=O)C=CC(=O)O</chem>                                                                                   | 1081     |
| <chem>CCOc1ccc(NC(=O)C)cc1N</chem>                                                                             | 1185     |
| <chem>Nc1cc(ccc1C(=O)O)[N+](=O)[O-]</chem>                                                                     | 1185     |
| <chem>O=C1OC(=O)c2cccc12</chem>                                                                                | 1185     |
| <chem>OCC(O)C1OC(=O)C(=C1O)O</chem>                                                                            | 1330.335 |
| <chem>COC(=O)c1ccc(O)cc1</chem>                                                                                | 1500     |
| <chem>CCCOC(=O)c1ccc(O)cc1</chem>                                                                              | 1500     |

|                                                                                         |                         |
|-----------------------------------------------------------------------------------------|-------------------------|
| <chem>CCCCC(CC)COC(=O)CCCCC(=O)OCC(CC)CCCC</chem>                                       | 1500                    |
| <chem>CC(=O)Nc1ccc(cc1)C(=O)CCl</chem>                                                  | 1580                    |
| <chem>CC(C)CCCC(C)CCCC(C)CCCC1(C)CCc2c(C)c(OC(=O)C)c(C)c(C)c2O1</chem>                  | 2000                    |
| <chem>COC(=O)c1ccccc1C(=O)OC</chem>                                                     | 2000                    |
| <chem>OC1=C(Oc2cc(O)cc(O)c2C1=O)c3ccc(O)c(O)c3</chem>                                   | 2034                    |
| <chem>COc1ccc(cc1N=Nc2c(O)c(cc3ccccc23)C(=O)Nc4cccc(c4)[N+](=O)[O-])[N+](=O)[O-]</chem> | 2100                    |
| <chem>CCOC(=O)COC(=O)c1ccccc1C(=O)OCC</chem>                                            | 2500                    |
| <chem>Nc1ccccc1C(=O)O</chem>                                                            | 2751                    |
| <chem>O=C1NS(=O)(=O)c2ccccc12</chem>                                                    | 3602                    |
| <chem>OS(=O)(=O)NC1CCCCC1</chem>                                                        | 3602                    |
| <chem>COc1cc(c(C)cc1N=Nc2c(O)ccc3cc(ccc23)S(=O)(=O)O)S(=O)(=O)O</chem>                  | 3739                    |
| <chem>CCOC(=O)c1ccccc1C(=O)OCC</chem>                                                   | 4435                    |
| <chem>CN(C)C1C2C(O)C3C(=C(O)c4c(O)ccc(Cl)c4C3(C)O)C(=O)C2(O)C(=O)C(=C(N)O)C1=O</chem>   | 5200                    |
| <chem>OCC(O)CO</chem>                                                                   | 6883                    |
| <chem>CCCCCCCCCCCC(=O)OCC(O)C1OCC(O)C1O</chem>                                          | 6883                    |
| <chem>CCCCCCCCCCCCCCCC(=O)OCC(O)C1OCC(O)C1O</chem>                                      | 7203                    |
| External validation set                                                                 |                         |
| Canonical_Smiles                                                                        | LOAEL<br>[mg/kg_bw/day] |
| <chem>CNC(=O)\C=C(/C)\OP(=O)(OC)OC</chem>                                               | 0.005                   |
| <chem>CCS(=O)CCSP(=O)(OC)OC</chem>                                                      | 0.028                   |
| <chem>Nc1c(c(nn1c2c(Cl)cc(cc2Cl)C(F)(F)F)C#N)C(F)(F)F</chem>                            | 0.032                   |
| <chem>COP(=O)(OC)O\C=C(/C(=O)N(C)C)\C</chem>                                            | 0.045                   |
| <chem>CCOP(=S)(OCC)OC(Cl)C(Cl)(Cl)Cl</chem>                                             | 0.311                   |
| <chem>C[C@@@H](Oc1ccc(Oc2ncc(Cl)cc2F)cc1)C(=O)OCC#C</chem>                              | 0.32                    |
| <chem>COC(=O)\C=C(/C)\OP(=O)(OC)OC</chem>                                               | 0.35                    |
| <chem>CCNP(=S)(OC)O\C=C(/C(=O)OC(C)C)\C</chem>                                          | 0.3645                  |
| <chem>N#CSCSC#N</chem>                                                                  | 0.4                     |
| <chem>CCCC[C@H](C)OC(=O)COc1ccc(Cl)c2ccncc12</chem>                                     | 0.42                    |
| <chem>CNC(=O)O\N=C\C(C)(C)SC</chem>                                                     | 0.47                    |
| <chem>CS(=O)(=O)c1ccc(C(=O)C2C(=O)CCCC2=O)c(c1)[N+](=O)[O-]</chem>                      | 0.48                    |
| <chem>CNC(=O)Oc1ccccc2OC(C)(C)Oc12</chem>                                               | 0.7745                  |
| <chem>[O-][N+](=O)C(Cl)(Cl)Cl</chem>                                                    | 1                       |
| <chem>CCCS(=O)(OCC)Oc1ccc(Br)cc1Cl</chem>                                               | 1                       |
| <chem>CC(C)N(C(=O)COc1nnc(s1)C(F)(F)F)c2ccc(F)cc2</chem>                                | 1.2                     |
| <chem>CCOP(=S)(OC(C)C)Oc1cnc(nc1)C(C)(C)C</chem>                                        | 1.71                    |
| <chem>COc1cc2OC[C@H]3Oc4c5C[C@@@H](Oc5ccc4C(=O)[C@H]3c2cc1OC)C(=C)C</chem>              | 1.88                    |
| <chem>COC(=O)C(C)Oc1ccc(Oc2ccc(Cl)cc2Cl)cc1</chem>                                      | 2                       |
| <chem>COC(=O)N(C(=O)N1CO[C@]2(Cc3cc(Cl)ccc3C2=N1)C(=O)OC)c4ccc</chem>                   | 2.13                    |

|                                                                       |        |
|-----------------------------------------------------------------------|--------|
| (OC(F)(F)F)cc4                                                        |        |
| CCOP(=O)(SC(C)CC)N1CCSC1=O                                            | 2.375  |
| CC1(C)[C@@H](C=C(Br)Br)[C@H]1C(=O)O[C@H](C#N)c2cccc(Oc3cccc3)c2       | 2.5    |
| Clc1ccc(CN2CCS/C/2=N\C#N)cn1                                          | 2.5    |
| Cc1nn(C)c(Oc2cccc2)c1\C=N\OCc3ccc(cc3)C(=O)OC(C)(C)C                  | 3      |
| CC1(C)[C@@H](C(Br)C(Br)(Br)Br)[C@H]1C(=O)O[C@H](C#N)c2ccc(Oc3cccc3)c2 | 3      |
| CN(\C=N\c1ccc(C)cc1C)\C=N\c2ccc(C)cc2C                                | 3.13   |
| CCCCOC(=O)[C@@H](C)Oc1ccc(Oc2ccc(cc2F)C#N)cc1                         | 3.44   |
| CCCCOC\C(=N\c1ccc(Cl)cc1C(F)(F)F)\n2ccnc2                             | 3.5    |
| Cl[C@@H]1[C@H](Cl)[C@@H](Cl)[C@H](Cl)[C@H](Cl)[C@H]1Cl                | 3.655  |
| [O-][N+](=O)c1cc(c(Cl)c(c1Nc2ncc(cc2Cl)C(F)(F)F)[N+](=O)[O-])C(F)(F)F | 3.7    |
| CC1=NNC(=O)N(C1)\N=C\c2ccnc2                                          | 3.76   |
| Cc1c(ccc(c1C2=NOCC2)S(=O)(=O)C)C(=O)c3cnn(C)c3O                       | 3.895  |
| CNC(=O)O\N=C(/SC)\C(=O)N(C)C                                          | 4.17   |
| Cc1c(F)c(F)c(COC(=O)[C@@H]2[C@H](\C=C(/Cl)\C(F)(F)F)C2(C)C)c(F)c1F    | 4.6    |
| CC1(C)CNC(=NC1)NN=C(\C=C\c2ccc(cc2)C(F)(F)F)\C=C\c3ccc(cc3)C(F)(F)F   | 4.9    |
| CC(C)(C)N1N=CC(=C(Cl)C1=O)SCc2ccc(cc2)C(C)(C)C                        | 5      |
| CCCCN(CC)c1c(cc(cc1[N+](=O)[O-])C(F)(F)F)[N+](=O)[O-]                 | 5.4    |
| Cc1c(COC(=O)C2C(\C=C(/Cl)\C(F)(F)F)C2(C)C)cccc1c3cccc3                | 6.1    |
| CCc1nn(C)c(C(=O)NCc2ccc(cc2)C(C)(C)C)c1Cl                             | 6.52   |
| CN1SC(=CC1=O)Cl                                                       | 6.6    |
| CN1CCN(Cc2occ(c2)c3ccc4nc(O)oc4c3)[C@H](C1)c5ccc(F)cc5                | 7      |
| CSC1=N[C@](C)(C(=O)N1Nc2cccc2)c3cccc3                                 | 7.07   |
| NC#N                                                                  | 7.5    |
| CCNc1nc(O)nc(NC(C)C)n1                                                | 7.75   |
| COP(=O)(OC)SCN1C(=O)Oc2cc(Cl)enc12                                    | 8.1    |
| CC(C)N1\C(=N\C(C)(C)C)\SCN(C1=O)c2cccc2                               | 8.7    |
| CC(CN1C[C@@H](C)O[C@@H](C)C1)Cc2ccc(cc2)C(C)(C)C                      | 8.8    |
| CCCCCCCCCCCC1=C(OC(=O)C)C(=O)c2cccc2C1=O                              | 9.02   |
| COc1ccc(cc1NNC(=O)OC(C)C)c2cccc2                                      | 9.7    |
| CCOC(=O)Nc1cccc(OC(=O)Nc2cccc2)c1                                     | 10.595 |
| C[C@H](Oc1ccc(Cl)cc1Cl)C(=O)O                                         | 11.01  |
| CBr                                                                   | 11.1   |
| CN1C(=O)N(C(=O)C=C1C(F)(F)F)c2ccc(Cl)c(c2)C(=O)OC(C)(C)C(=O)OCC=C     | 11.4   |
| CCOC(=O)CSc1nc(nn1C(=O)N(C)C)C(C)(C)C                                 | 11.5   |
| CCCCOCN(C(=O)CCl)c1c(CC)cccc1CC                                       | 11.85  |
| CNC(=O)Oc1cccc(c1)\N=C\N(C)C                                          | 12     |

|                                                                                                                                                                            |        |
|----------------------------------------------------------------------------------------------------------------------------------------------------------------------------|--------|
| CS\C(=N\OC(=O)N(C)SN(C)C(=O)O\N=C(/C)\SC)\C                                                                                                                                | 12     |
| Clc1cc(Cl)c(cc1OCC#C)N2N=C3CCCCN3C2=O                                                                                                                                      | 12.1   |
| ClC\C=C\Cl                                                                                                                                                                 | 12.5   |
| CC1(C)C\C=C(/Cl)\C(F)(F)F)C1C(=O)OC(C#N)c2cccc(Oc3ccccc3)c2                                                                                                                | 12.5   |
| CCOC(=O)CC(SP(=O)(OC)OC)C(=O)OCC                                                                                                                                           | 13     |
| CCC(C)(C)C(=O)OC1=C(C(=O)OC12CCCCC2)c3ccc(Cl)cc3Cl                                                                                                                         | 14.7   |
| Oc1cc(Cl)ccc1Oc2ccc(Cl)cc2Cl                                                                                                                                               | 15     |
| CC(C1CC1)C(O)(Cn2en2)c3ccc(Cl)cc3                                                                                                                                          | 15.59  |
| FC(F)(F)c1cccc(OCCCoc2c(Cl)cc(OCC=C(Cl)Cl)cc2Cl)n1                                                                                                                         | 17.1   |
| CN(Cc1ccc(Cl)nc1)\C(=N\C#N)\C                                                                                                                                              | 17.5   |
| Fe1cc2OCC(=O)N(CC#C)c2cc1N3C(=O)C4=C(CCCC4)C3=O                                                                                                                            | 18     |
| CNC(=O)O\N=C(/C)\SC                                                                                                                                                        | 20     |
| NC(=O)CN1C(=O)C=C(CCN2CCN(CC2)c3nccc4sccc34)c5ccc(F)cc15                                                                                                                   | 20     |
| CCCCNC(=O)OCC#Cl                                                                                                                                                           | 20.1   |
| CCNc1nc(NC(C)C)nc(SC)n1                                                                                                                                                    | 20.9   |
| CON(C)C(=O)Nc1ccc(Oc2ccc3c(OC(C)(CC3(C)C)OC)c2)cc1                                                                                                                         | 23.1   |
| COc1nc(NC(C)C)nc(NC(C)C)n1                                                                                                                                                 | 23.3   |
| CC[C@H]1CCC[C@H](O[C@H]2CC[C@@H]([C@@H](C)O2)N(C)C)[C@@H](C)C(=O)C3=C[C@H]4[C@@H]5C[C@@H](C[C@H]5C(=C[C@H]4[C@@H]3CC(=O)O1)C)O[C@@H]6O[C@@H](C)[C@H](OC)[C@@H](OC)[C@H]6OC | 24.1   |
| CC1COC(Cn2en2)(O1)c3ccc(Oc4ccc(Cl)cc4)cc3Cl                                                                                                                                | 24.12  |
| CC(C)c1ccc(cc1S(=O)(=O)C)C(=O)N=C(N)N                                                                                                                                      | 25     |
| OC(=O)C1(CC1)C(=O)Nc2ccc(Cl)cc2Cl                                                                                                                                          | 25.5   |
| FC(F)C(F)(F)OCC(Cn1en1)c2ccc(Cl)cc2Cl                                                                                                                                      | 27.7   |
| CO\N=C(/C(=O)OC)\c1ccccc1CO\N=C(/C)\c2ccccc2)C(F)(F)F                                                                                                                      | 29.7   |
| OC(=O)CCCOc1ccc(Cl)cc1Cl                                                                                                                                                   | 30     |
| Oc1ccc(Cl)cc1Cc2ccccc2                                                                                                                                                     | 30     |
| CCNC(=O)NC(=O)\C(=N\OC)\C#N                                                                                                                                                | 30.3   |
| COC(=O)c1ccc(C)c1S(=O)(=O)NC(=O)Nc2nc(OCC(F)(F)F)nc(n2)N(C)C                                                                                                               | 30.6   |
| CCCN(CC)CC1COC2(CCC(CC2)C(C)(C)C)O1                                                                                                                                        | 32.81  |
| COCC(C)N(C(=O)CCl)c1c(C)esc1C                                                                                                                                              | 36     |
| CC(C)(C)C(O)\C(=C/c1ccc(Cl)cc1Cl)\n2en2                                                                                                                                    | 39.4   |
| CC(C)(C)[C@H](O)\C(=C/c1ccc(Cl)cc1)\n2en2                                                                                                                                  | 39.41  |
| OCC(Br)(CO)[N+](=O)[O-]                                                                                                                                                    | 40     |
| NC1=C(Cl)C(=O)N(N=C1)c2ccccc2                                                                                                                                              | 40.095 |
| CC1OC(C)OC(C)OC(C)O1                                                                                                                                                       | 44     |
| O=CCCCC=O                                                                                                                                                                  | 45.63  |
| CCCC(=C1C(=O)CC(CC(C)SCC)CC1=O)NOCC                                                                                                                                        | 48     |
| CC(C)(NC(=O)c1cc(Cl)cc(Cl)c1)C#C                                                                                                                                           | 48.8   |
| CCOC(=O)NC(=S)Nc1ccccc1NC(=S)NC(=O)OCC                                                                                                                                     | 50     |
| CCC(CC)Nc1c(cc(C)c(C)c1[N+](=O)[O-])[N+](=O)[O-]                                                                                                                           | 51     |

|                                                           |        |
|-----------------------------------------------------------|--------|
| CCCN(CCC)c1c(cc(cc1[N+](=O)[O-])S(=O)(=O)N)[N+](=O)[O-]   | 51.445 |
| COe1ccc(cc1OC)\C(=C\C(=O)N2CCOCC2)\e3ccc(Cl)cc3           | 55.55  |
| CSc1nc(NC(C)C)nc(NC(C)C)n1                                | 60.88  |
| CC(C)(C)C(O)C(Cc1ccc(Cl)cc1)n2cncn2                       | 62.5   |
| CN1COCN(Cc2cnc(Cl)s2)/C/1=N/[N+](=O)[O-]                  | 63     |
| CCCCCCCCC[N+](C)(C)CCCCCCCCC                              | 64     |
| NC(=O)C(Br)(Br)C#N                                        | 71.29  |
| Clc1ccc(cc1)c2ccccc2NC(=O)c3ccnc3Cl                       | 73     |
| Brc1ccc(OC(=O)N2CCN3CCC2CC3)cc1                           | 75     |
| Fc1ccc(Oc2ccnc3cc(Cl)cc(Cl)c23)cc1                        | 80     |
| CO\C=C\C(=O)OC/c1ccccc1Oc2cc(Oc3ccccc3C#N)nncn2           | 82.4   |
| CC(=C[C@@H]1[C@@H](C(=O)O[C@H]2CC(=O)C(=C2C)CC=C)C1(C)C)C | 82.6   |
| CCOC(=O)COc1cc(c(F)cc1Cl)c2nn(C)c(OC(F)F)c2Cl             | 86.7   |
| CCCCCCCCCCCCC[N+](C)(C)[O-]                               | 87.4   |
| CCCCCCCCCCCCC[N+](C)(C)Cc1ccccc1                          | 88     |
| Clc1cc(NC(=O)Nc2ccccc2)ccn1                               | 93     |
| CC\C(=N/OC\C=C\Cl)\C1=C(O)CC(CC1=O)C2CCOCC2               | 94.5   |
| C\N=C(\NCc1cnc(Cl)s1)/N[N+](=O)[O-]                       | 97.8   |
| CCSC(C)CC1CC(=O)C(=C(CC)NOC\C=C\Cl)C(=O)C1                | 100    |
| CCOc1nc(F)cc2nc(nn12)S(=O)(=O)Nc3c(Cl)ccccc3Cl            | 102.2  |
| CC(C)(C)C(=O)[C@@H](Oc1ccc(Cl)cc1)n2cncn2                 | 114    |
| CCONC(=C1C(=O)CC(CC1=O)c2c(C)cc(C)cc2C)CC                 | 117.9  |
| CCCCC(C)c1ccc(cc1OC(=O)\C=C/C)[N+](=O)[O-][N+](=O)[O-]    | 120.8  |
| CCS(=O)(=O)c1ccnc1S(=O)(=O)NC(=O)Nc2nc(OC)cc(OC)n2        | 121    |
| COC(=O)CSc1cc(\N=C\2/SC(=O)N3CCCCN23)c(F)cc1Cl            | 130    |
| COC(=O)c1c(Cl)nn(C)c1S(=O)(=O)NC(=O)Nc2nc(OC)cc(OC)n2     | 138.6  |
| CC(C)[C@]12CC[C@](C)(O1)[C@@H](C2)OCc3ccccc3C             | 150    |
| OC(=O)c1nc(Cl)ccc1Cl                                      | 150    |
| CCCC(CC)CN1C(=O)C2C3CC(C=C3)C2C1=O                        | 150    |
| C[C@H]1[C@@H](SC(=O)N1C(=O)NC2CCCC2)c3ccc(Cl)cc3          | 163    |
| CCCN(CCC)c1c(cc(cc1[N+](=O)[O-])C(F)(F)F)[N+](=O)[O-]     | 169    |
| CC1(C)[C@@H](C=C(Cl)Cl)[C@H]1C(=O)OCc2ccccc(Oc3ccccc3)c2  | 170.75 |
| CCOc1ccc(cc1C2COC(=N2)c3c(F)ccccc3F)C(C)(C)C              | 201.5  |
| Cc1cc(C)nc(Nc2ccccc2)n1                                   | 221    |
| CCS(=O)(=O)c1nc2cccn2c1S(=O)(=O)NC(=O)Nc3nc(OC)cc(OC)n3   | 244.2  |
| COS(=O)(=O)[O-].C[n+]1c(cc(c2ccccc2)n1C)c3ccccc3          | 250    |
| COc1cnc(OC)n2nc(NS(=O)(=O)c3c(OCC(F)F)ccccc3(F)(F)F)nc12  | 254    |
| CO\N=C(\C1=NOCCO1)/c2ccccc2Oc3nnc(Oc4ccccc4Cl)c3F         | 271.9  |
| CC1(C)CC\C(=C\c2ccc(Cl)cc2)\C1(O)Cn3cncn3                 | 286.6  |
| CCC[N+](C)(C)CC[N+](C)(C)CCOC                             | 300    |
| CSC(=O)c1ccccc2nnsc12                                     | 312    |
| CCCCCOC(=O)COc1cc(N2C(=O)C3=C(CCCC3)C2=O)c(F)cc1Cl        | 360.4  |

|                                                          |       |
|----------------------------------------------------------|-------|
| <chem>CCN(CC)C(=O)c1cccc(C)c1</chem>                     | 400   |
| <chem>Oc1ccc(Cl)cc1C(=O)Nc2ccc(cc2Cl)[N+](=O)[O-]</chem> | 410   |
| <chem>CCOC1Oc2ccc(OS(=O)(=O)C)cc2C1(C)C</chem>           | 469   |
| <chem>CC1(C)N(Cl)C(=O)N(Cl)C1=O</chem>                   | 634.5 |
| <chem>C\N=C(\NCC1CCOC1)/N[N+](=O)[O-]</chem>             | 991   |
| <chem>CC1(C)NC(=O)NC1=O</chem>                           | 1000  |
| <chem>Cc1ccn2nc(nc2n1)S(=O)(=O)Nc3c(F)cccc3F</chem>      | 1000  |
| <chem>NNC(=O)C=CC(=O)O</chem>                            | 1956  |

Table S2. The SVM parameters C and  $\gamma$  for all models.

| Threshold | Fingerprint type | C       | $\gamma$ |
|-----------|------------------|---------|----------|
| 5         | Estate           | 1.4142  | 0.25     |
|           | Extend           | 5.6569  | 0.0078   |
|           | FP               | 11.3137 | 0.0078   |
|           | MACCS            | 2       | 0.0221   |
|           | Pubchem          | 2.8284  | 0.0039   |
|           | SubFP            | 8       | 0.0625   |
| 10        | Estate           | 0.7071  | 0.25     |
|           | Extend           | 1.4142  | 0.0055   |
|           | FP               | 16      | 0.0078   |
|           | MACCS            | 1       | 0.0625   |
|           | Pubchem          | 2.8284  | 0.0078   |
|           | SubFP            | 1       | 0.125    |
| 50        | Estate           | 1       | 0.5      |
|           | Extend           | 0.7071  | 0.011    |
|           | FP               | 1       | 0.0078   |
|           | MACCS            | 1       | 0.0312   |
|           | Pubchem          | 2       | 0.0055   |
|           | SubFP            | 1.4142  | 0.125    |
| 100       | Estate           | 1       | 0.7071   |
|           | Extend           | 1.4142  | 0.011    |
|           | FP               | 1.4142  | 0.011    |
|           | MACCS            | 2.83    | 0.0884   |
|           | Pubchem          | 4       | 0.0039   |
|           | SubFP            | 2       | 0.0884   |
| 10&50     | Estate           | 0.70711 | 0.3536   |
|           | Extend           | 1       | 0.0884   |
|           | FP               | 2       | 0.011    |
|           | MACCS            | 2       | 0.0884   |
|           | Pubchem          | 2.8284  | 0.0055   |
|           | SubFP            | 2.8284  | 0.011    |



Table S3. Performance of models on 5-fold cross validation

| Threshold=5 mgkgday         |        |        |        |        |        |
|-----------------------------|--------|--------|--------|--------|--------|
| Model                       | Q      | SE     | SP     | AUC    | MCC    |
| Estate_kNN                  | 0.775  | 0.3936 | 0.8813 | 0.6917 | 0.2964 |
| Estate_SVM                  | 0.8307 | 0.3617 | 0.9614 | 0.7578 | 0.4281 |
| Estate_Random Forest        | 0.8329 | 0.3298 | 0.9733 | 0.7666 | 0.4313 |
| Estate_Naive Bayes          | 0.8051 | 0.3936 | 0.9199 | 0.7478 | 0.3641 |
| Estate_Classification Tree  | 0.7819 | 0.4255 | 0.8813 | 0.7035 | 0.3259 |
| Extend_kNN                  | 0.8051 | 0.3936 | 0.9199 | 0.7131 | 0.3641 |
| Extend_SVM                  | 0.8098 | 0.2447 | 0.9674 | 0.7545 | 0.3248 |
| Extend_Random Forest        | 0.8051 | 0.2128 | 0.9703 | 0.7427 | 0.2971 |
| Extend_Naive Bayes          | 0.7331 | 0.5532 | 0.7834 | 0.6833 | 0.3063 |
| Extend_Classification Tree  | 0.7354 | 0.4043 | 0.8279 | 0.6359 | 0.2304 |
| FP_kNN                      | 0.8098 | 0.383  | 0.9288 | 0.7083 | 0.3719 |
| FP_SVM                      | 0.819  | 0.2553 | 0.9763 | 0.751  | 0.3648 |
| FP_Random Forest            | 0.8004 | 0.2234 | 0.9614 | 0.7353 | 0.2831 |
| FP_Naive Bayes              | 0.7099 | 0.4787 | 0.7745 | 0.6275 | 0.2327 |
| FP_Classification Tree      | 0.7262 | 0.4787 | 0.7953 | 0.672  | 0.2565 |
| MACCS_kNN                   | 0.7749 | 0.4468 | 0.8665 | 0.7577 | 0.3223 |
| MACCS_SVM                   | 0.8353 | 0.3617 | 0.9674 | 0.7611 | 0.4444 |
| MACCS_Random Forest         | 0.8214 | 0.3298 | 0.9585 | 0.7847 | 0.3893 |
| MACCS_Naive Bayes           | 0.7726 | 0.5106 | 0.8457 | 0.7469 | 0.3486 |
| MACCS_Classification Tree   | 0.7632 | 0.4362 | 0.8546 | 0.6897 | 0.2954 |
| Pubchem_kNN                 | 0.7888 | 0.4043 | 0.8961 | 0.6753 | 0.3307 |
| Pubchem_SVM                 | 0.8283 | 0.3723 | 0.9555 | 0.7325 | 0.4227 |
| Pubchem_Random Forest       | 0.8376 | 0.4149 | 0.9555 | 0.7746 | 0.462  |
| Pubchem_Naive Bayes         | 0.733  | 0.4894 | 0.8012 | 0.6953 | 0.2728 |
| Pubchem_Classification Tree | 0.7796 | 0.4894 | 0.8605 | 0.7094 | 0.3513 |
| SubFP_kNN                   | 0.7772 | 0.4255 | 0.8754 | 0.732  | 0.3166 |
| SubFP_SVM                   | 0.8143 | 0.3298 | 0.9496 | 0.7437 | 0.3667 |
| SubFP_Random Forest         | 0.8422 | 0.3936 | 0.9674 | 0.771  | 0.4738 |
| SubFP_Naive Bayes           | 0.7704 | 0.4362 | 0.8635 | 0.7207 | 0.3083 |
| SubFP_Classification Tree   | 0.8098 | 0.4787 | 0.9021 | 0.711  | 0.4085 |
| Threshold=10 mgkgday        |        |        |        |        |        |
| Model                       | Q      | SE     | SP     | AUC    | MCC    |
| Estate_kNN                  | 0.7053 | 0.4436 | 0.8221 | 0.7002 | 0.2799 |
| Estate_SVM                  | 0.7588 | 0.3158 | 0.9564 | 0.6965 | 0.3768 |
| Estate_Random Forest        | 0.7449 | 0.2707 | 0.9564 | 0.7451 | 0.3304 |
| Estate_Naive Bayes          | 0.731  | 0.3835 | 0.8859 | 0.7081 | 0.3127 |
| Estate_Classification Tree  | 0.6892 | 0.4436 | 0.7987 | 0.6377 | 0.2503 |
| Extend_kNN                  | 0.7356 | 0.4662 | 0.8557 | 0.7119 | 0.3463 |
| Extend_SVM                  | 0.7588 | 0.3383 | 0.9463 | 0.7255 | 0.3772 |

|                             |        |        |        |        |        |
|-----------------------------|--------|--------|--------|--------|--------|
| Extend_Random Forest        | 0.7262 | 0.2632 | 0.9329 | 0.7025 | 0.2714 |
| Extend_Naive Bayes          | 0.6568 | 0.6015 | 0.6812 | 0.6905 | 0.2659 |
| Extend_Classification Tree  | 0.6683 | 0.5188 | 0.7349 | 0.6149 | 0.2468 |
| FP_kNN                      | 0.7426 | 0.4511 | 0.8725 | 0.7058 | 0.3566 |
| FP_SVM                      | 0.7495 | 0.3308 | 0.9362 | 0.7257 | 0.3492 |
| FP_Random Forest            | 0.7355 | 0.2556 | 0.9497 | 0.7064 | 0.2987 |
| FP_Naive Bayes              | 0.6474 | 0.6015 | 0.6678 | 0.6971 | 0.2524 |
| FP_Classification Tree      | 0.6661 | 0.4361 | 0.7685 | 0.5905 | 0.2072 |
| MACCS_kNN                   | 0.696  | 0.4662 | 0.7987 | 0.7384 | 0.2715 |
| MACCS_SVM                   | 0.7518 | 0.3835 | 0.9161 | 0.7647 | 0.3631 |
| MACCS_Random Forest         | 0.754  | 0.3684 | 0.9262 | 0.7671 | 0.3668 |
| MACCS_Naive Bayes           | 0.7007 | 0.5414 | 0.7718 | 0.7145 | 0.3089 |
| MACCS_Classification Tree   | 0.7285 | 0.5564 | 0.8054 | 0.6588 | 0.3625 |
| Pubchem_kNN                 | 0.71   | 0.4436 | 0.8289 | 0.6857 | 0.2887 |
| Pubchem_SVM                 | 0.7587 | 0.3609 | 0.9362 | 0.7126 | 0.3788 |
| Pubchem_Random Forest       | 0.7424 | 0.3684 | 0.9094 | 0.767  | 0.3367 |
| Pubchem_Naive Bayes         | 0.6684 | 0.4887 | 0.7483 | 0.6861 | 0.2338 |
| Pubchem_Classification Tree | 0.6915 | 0.5263 | 0.7651 | 0.6433 | 0.2874 |
| SubFP_kNN                   | 0.7054 | 0.4586 | 0.8154 | 0.7158 | 0.2855 |
| SubFP_SVM                   | 0.7541 | 0.3233 | 0.9463 | 0.751  | 0.3623 |
| SubFP_Random Forest         | 0.7495 | 0.2782 | 0.9597 | 0.75   | 0.3462 |
| SubFP_Naive Bayes           | 0.6824 | 0.4962 | 0.7651 | 0.681  | 0.2598 |
| SubFP_Classification Tree   | 0.7217 | 0.4887 | 0.8255 | 0.6785 | 0.3264 |
| Threshold=50 mgkgday        |        |        |        |        |        |
| Model                       | Q      | SE     | SP     | AUC    | MCC    |
| Estate_kNN                  | 0.6844 | 0.7481 | 0.5818 | 0.7204 | 0.3307 |
| Estate_SVM                  | 0.7076 | 0.8797 | 0.4303 | 0.7211 | 0.3533 |
| Estate_Random Forest        | 0.659  | 0.7331 | 0.5394 | 0.7184 | 0.2741 |
| Estate_Naive Bayes          | 0.6774 | 0.7368 | 0.5818 | 0.7351 | 0.3183 |
| Estate_Classification Tree  | 0.6472 | 0.7218 | 0.5273 | 0.6655 | 0.2503 |
| Extend_kNN                  | 0.6218 | 0.6278 | 0.6121 | 0.6852 | 0.2339 |
| Extend_SVM                  | 0.6843 | 0.8759 | 0.3758 | 0.7105 | 0.2951 |
| Extend_Random Forest        | 0.6634 | 0.7406 | 0.5394 | 0.6907 | 0.2824 |
| Extend_Naive Bayes          | 0.6657 | 0.6955 | 0.6182 | 0.6833 | 0.3085 |
| Extend_Classification Tree  | 0.6404 | 0.7218 | 0.5091 | 0.6363 | 0.2329 |
| FP_kNN                      | 0.638  | 0.6165 | 0.6727 | 0.6825 | 0.2812 |
| FP_SVM                      | 0.6819 | 0.8571 | 0.4    | 0.7192 | 0.2921 |
| FP_Random Forest            | 0.6473 | 0.7218 | 0.5273 | 0.6654 | 0.2503 |
| FP_Naive Bayes              | 0.6565 | 0.6729 | 0.6303 | 0.675  | 0.2967 |
| FP_Classification Tree      | 0.6471 | 0.7444 | 0.4909 | 0.6145 | 0.2405 |
| MACCS_kNN                   | 0.6705 | 0.7669 | 0.5152 | 0.701  | 0.2892 |
| MACCS_SVM                   | 0.7307 | 0.8835 | 0.4848 | 0.7536 | 0.4094 |

|                             |        |        |        |        |        |
|-----------------------------|--------|--------|--------|--------|--------|
| MACCS_Random Forest         | 0.6984 | 0.7519 | 0.6121 | 0.7419 | 0.3632 |
| MACCS_Naive Bayes           | 0.6751 | 0.688  | 0.6545 | 0.7259 | 0.3352 |
| MACCS_Classification Tree   | 0.6404 | 0.703  | 0.5394 | 0.632  | 0.2416 |
| Pubchem_kNN                 | 0.6799 | 0.7632 | 0.5455 | 0.702  | 0.3135 |
| Pubchem_SVM                 | 0.7168 | 0.8684 | 0.4727 | 0.7494 | 0.377  |
| Pubchem_Random Forest       | 0.7007 | 0.782  | 0.5697 | 0.7317 | 0.3577 |
| Pubchem_Naive Bayes         | 0.6613 | 0.6767 | 0.6364 | 0.7001 | 0.3063 |
| Pubchem_Classification Tree | 0.652  | 0.7105 | 0.5576 | 0.6511 | 0.2669 |
| SubFP_kNN                   | 0.6728 | 0.7632 | 0.5273 | 0.6916 | 0.2964 |
| SubFP_SVM                   | 0.7169 | 0.8759 | 0.4606 | 0.7364 | 0.3763 |
| SubFP_Random Forest         | 0.6915 | 0.8233 | 0.4788 | 0.7182 | 0.3228 |
| SubFP_Naive Bayes           | 0.6868 | 0.7406 | 0.6    | 0.714  | 0.3395 |
| SubFP_Classification Tree   | 0.6473 | 0.6955 | 0.5697 | 0.6592 | 0.2625 |
| Threshold=100 mg/kg/day     |        |        |        |        |        |
| Model                       | Q      | SE     | SP     | AUC    | MCC    |
| Estate_kNN                  | 0.7171 | 0.7803 | 0.5635 | 0.7581 | 0.3352 |
| Estate_SVM                  | 0.7797 | 0.941  | 0.3889 | 0.7739 | 0.4141 |
| Estate_Random Forest        | 0.7656 | 0.9049 | 0.4286 | 0.7891 | 0.3847 |
| Estate_Naive Bayes          | 0.7354 | 0.8164 | 0.5397 | 0.776  | 0.3578 |
| Estate_Classification Tree  | 0.7194 | 0.8131 | 0.4921 | 0.7069 | 0.3105 |
| Extend_kNN                  | 0.7194 | 0.7639 | 0.6111 | 0.7536 | 0.3587 |
| Extend_SVM                  | 0.7842 | 0.9475 | 0.3889 | 0.7928 | 0.4276 |
| Extend_Random Forest        | 0.7493 | 0.8787 | 0.4365 | 0.7684 | 0.3499 |
| Extend_Naive Bayes          | 0.6892 | 0.7213 | 0.6111 | 0.7158 | 0.3122 |
| Extend_Classification Tree  | 0.652  | 0.7082 | 0.5159 | 0.6127 | 0.2127 |
| FP_kNN                      | 0.6985 | 0.7246 | 0.6349 | 0.749  | 0.3368 |
| FP_SVM                      | 0.7842 | 0.9443 | 0.3968 | 0.7903 | 0.4282 |
| FP_Random Forest            | 0.7285 | 0.8557 | 0.4206 | 0.7489 | 0.301  |
| FP_Naive Bayes              | 0.6822 | 0.7016 | 0.6349 | 0.7218 | 0.3129 |
| FP_Classification Tree      | 0.7126 | 0.7934 | 0.5159 | 0.6578 | 0.3079 |
| MACCS_kNN                   | 0.7749 | 0.859  | 0.5714 | 0.8092 | 0.4426 |
| MACCS_SVM                   | 0.8005 | 0.9443 | 0.4524 | 0.8263 | 0.4784 |
| MACCS_Random Forest         | 0.7843 | 0.8852 | 0.5397 | 0.7989 | 0.4532 |
| MACCS_Naive Bayes           | 0.7171 | 0.7377 | 0.6667 | 0.759  | 0.3788 |
| MACCS_Classification Tree   | 0.7264 | 0.7934 | 0.5635 | 0.7026 | 0.3507 |
| Pubchem_kNN                 | 0.7216 | 0.8098 | 0.5079 | 0.7271 | 0.3208 |
| Pubchem_SVM                 | 0.7865 | 0.941  | 0.4127 | 0.796  | 0.4362 |
| Pubchem_Random Forest       | 0.7634 | 0.8754 | 0.4921 | 0.7697 | 0.396  |
| Pubchem_Naive Bayes         | 0.7077 | 0.7443 | 0.619  | 0.724  | 0.3439 |
| Pubchem_Classification Tree | 0.7216 | 0.8197 | 0.4841 | 0.6774 | 0.3116 |
| SubFP_kNN                   | 0.7449 | 0.8361 | 0.5238 | 0.7476 | 0.3691 |
| SubFP_SVM                   | 0.768  | 0.9344 | 0.3651 | 0.7929 | 0.3783 |

|                           |        |        |        |        |        |
|---------------------------|--------|--------|--------|--------|--------|
| SubFP_Random Forest       | 0.7493 | 0.9279 | 0.3175 | 0.7763 | 0.318  |
| SubFP_Naive Bayes         | 0.747  | 0.8066 | 0.6032 | 0.7739 | 0.4018 |
| SubFP_Classification Tree | 0.7217 | 0.823  | 0.4762 | 0.6755 | 0.3085 |

Table S4. Performance of models on external validation.

| Threshold=5 mgkgday         |        |        |        |        |        |
|-----------------------------|--------|--------|--------|--------|--------|
| Model                       | Q      | SE     | SP     | AUC    | MCC    |
| Estate_kNN                  | 0.8621 | 0.5833 | 0.9541 | 0.8481 | 0.6053 |
| Estate_SVM                  | 0.8000 | 0.2500 | 0.9817 | 0.8096 | 0.3780 |
| Estate_Random Forest        | 0.7931 | 0.1944 | 0.9908 | 0.7877 | 0.3506 |
| Estate_Naive Bayes          | 0.8000 | 0.2778 | 0.9725 | 0.6988 | 0.3784 |
| Estate_Classification Tree  | 0.7517 | 0.3611 | 0.8807 | 0.6304 | 0.2724 |
| Extend_kNN                  | 0.8276 | 0.5000 | 0.9358 | 0.8265 | 0.4984 |
| Extend_SVM                  | 0.8345 | 0.4444 | 0.9633 | 0.8588 | 0.5108 |
| Extend_Random Forest        | 0.8345 | 0.3611 | 0.9908 | 0.8140 | 0.5148 |
| Extend_Naive Bayes          | 0.7793 | 0.5000 | 0.8716 | 0.7167 | 0.3871 |
| Extend_Classification Tree  | 0.7793 | 0.5000 | 0.8716 | 0.7132 | 0.3871 |
| FP_kNN                      | 0.8276 | 0.5000 | 0.9358 | 0.7866 | 0.4984 |
| FP_SVM                      | 0.8345 | 0.4444 | 0.9633 | 0.8372 | 0.5108 |
| FP_Random Forest            | 0.7862 | 0.2222 | 0.9725 | 0.8108 | 0.3177 |
| FP_Naive Bayes              | 0.7241 | 0.4444 | 0.8165 | 0.6593 | 0.2610 |
| FP_Classification Tree      | 0.7724 | 0.4722 | 0.8716 | 0.7180 | 0.3623 |
| MACCS_kNN                   | 0.8483 | 0.6667 | 0.9083 | 0.7852 | 0.5862 |
| MACCS_SVM                   | 0.8138 | 0.3056 | 0.9817 | 0.8160 | 0.4343 |
| MACCS_Random Forest         | 0.8000 | 0.2778 | 0.9725 | 0.7987 | 0.3784 |
| MACCS_Naive Bayes           | 0.7862 | 0.4444 | 0.8991 | 0.7852 | 0.3812 |
| MACCS_Classification Tree   | 0.7931 | 0.5833 | 0.8624 | 0.7715 | 0.4457 |
| Pubchem_kNN                 | 0.8345 | 0.5833 | 0.9174 | 0.8099 | 0.5341 |
| Pubchem_SVM                 | 0.8000 | 0.2500 | 0.9817 | 0.8119 | 0.3780 |
| Pubchem_Random Forest       | 0.8207 | 0.3333 | 0.9817 | 0.8005 | 0.4607 |
| Pubchem_Naive Bayes         | 0.7379 | 0.3889 | 0.8532 | 0.7201 | 0.2582 |
| Pubchem_Classification Tree | 0.8138 | 0.4167 | 0.9450 | 0.7150 | 0.4439 |
| SubFP_kNN                   | 0.7793 | 0.5556 | 0.8532 | 0.8001 | 0.4088 |
| SubFP_SVM                   | 0.8207 | 0.3611 | 0.9725 | 0.8135 | 0.4600 |
| SubFP_Random Forest         | 0.8000 | 0.2500 | 0.9817 | 0.7252 | 0.3780 |
| SubFP_Naive Bayes           | 0.7517 | 0.3333 | 0.8899 | 0.6095 | 0.2595 |
| SubFP_Classification Tree   | 0.8207 | 0.3889 | 0.9633 | 0.7231 | 0.4614 |
| Threshold=10 mgkgday        |        |        |        |        |        |
| Model                       | Q      | SE     | SP     | AUC    | MCC    |
| Estate_kNN                  | 0.7655 | 0.5510 | 0.8750 | 0.7894 | 0.4544 |
| Estate_SVM                  | 0.7241 | 0.2041 | 0.9896 | 0.7752 | 0.3460 |
| Estate_Random Forest        | 0.7241 | 0.2041 | 0.9896 | 0.7230 | 0.3460 |
| Estate_Naive Bayes          | 0.7172 | 0.3265 | 0.9167 | 0.6649 | 0.3095 |
| Estate_Classification Tree  | 0.6966 | 0.4898 | 0.8021 | 0.6602 | 0.3023 |
| Extend_kNN                  | 0.7448 | 0.5510 | 0.8438 | 0.7927 | 0.4117 |
| Extend_SVM                  | 0.7724 | 0.4286 | 0.9479 | 0.7950 | 0.4642 |

|                             |        |        |        |        |         |
|-----------------------------|--------|--------|--------|--------|---------|
| Extend_Random Forest        | 0.7724 | 0.4082 | 0.9583 | 0.7755 | 0.4665  |
| Extend_Naive Bayes          | 0.6552 | 0.4694 | 0.7500 | 0.6644 | 0.2217  |
| Extend_Classification Tree  | 0.7034 | 0.5918 | 0.7604 | 0.6956 | 0.3474  |
| FP_kNN                      | 0.7517 | 0.5306 | 0.8646 | 0.7787 | 0.4216  |
| FP_SVM                      | 0.7724 | 0.4286 | 0.9479 | 0.8031 | 0.4642  |
| FP_Random Forest            | 0.7448 | 0.3265 | 0.9583 | 0.7511 | 0.3908  |
| FP_Naive Bayes              | 0.6414 | 0.4490 | 0.7396 | 0.6576 | 0.1906  |
| FP_Classification Tree      | 0.7448 | 0.5714 | 0.8333 | 0.7248 | 0.4164  |
| MACCS_kNN                   | 0.7655 | 0.6122 | 0.8438 | 0.7891 | 0.4662  |
| MACCS_SVM                   | 0.7517 | 0.4082 | 0.9271 | 0.7759 | 0.4074  |
| MACCS_Random Forest         | 0.6897 | 0.3061 | 0.8854 | 0.7636 | 0.2362  |
| MACCS_Naive Bayes           | 0.6828 | 0.4490 | 0.8021 | 0.7292 | 0.2637  |
| MACCS_Classification Tree   | 0.7034 | 0.5306 | 0.7917 | 0.6622 | 0.3275  |
| Pubchem_kNN                 | 0.7655 | 0.5918 | 0.8542 | 0.7908 | 0.4619  |
| Pubchem_SVM                 | 0.7241 | 0.3469 | 0.9167 | 0.7580 | 0.3301  |
| Pubchem_Random Forest       | 0.7586 | 0.2857 | 1.0000 | 0.7765 | 0.4576  |
| Pubchem_Naive Bayes         | 0.6207 | 0.4694 | 0.6979 | 0.6682 | 0.1650  |
| Pubchem_Classification Tree | 0.6897 | 0.5306 | 0.7708 | 0.6700 | 0.3030  |
| SubFP_kNN                   | 0.7103 | 0.5918 | 0.7708 | 0.8055 | 0.3592  |
| SubFP_SVM                   | 0.7241 | 0.2653 | 0.9583 | 0.7722 | 0.3288  |
| SubFP_Random Forest         | 0.7241 | 0.2245 | 0.9792 | 0.6848 | 0.3372  |
| SubFP_Naive Bayes           | 0.6138 | 0.4286 | 0.7083 | 0.6437 | 0.1369  |
| SubFP_Classification Tree   | 0.6897 | 0.5102 | 0.7812 | 0.6400 | 0.2962  |
| Threshold=50 mgkgday        |        |        |        |        |         |
| Model                       | Q      | SE     | SP     | AUC    | MCC     |
| Estate_kNN                  | 0.6345 | 0.7419 | 0.4423 | 0.6318 | 0.1888  |
| Estate_SVM                  | 0.6759 | 0.8925 | 0.2885 | 0.6705 | 0.2297  |
| Estate_Random Forest        | 0.6069 | 0.8172 | 0.2308 | 0.6380 | 0.0575  |
| Estate_Naive Bayes          | 0.6276 | 0.7849 | 0.3462 | 0.6203 | 0.1430  |
| Estate_Classification Tree  | 0.6483 | 0.7634 | 0.4423 | 0.5985 | 0.2133  |
| Extend_kNN                  | 0.6552 | 0.7204 | 0.5385 | 0.6721 | 0.2568  |
| Extend_SVM                  | 0.6138 | 0.8817 | 0.1346 | 0.6262 | 0.0238  |
| Extend_Random Forest        | 0.6414 | 0.8280 | 0.3077 | 0.6546 | 0.1569  |
| Extend_Naive Bayes          | 0.5793 | 0.7634 | 0.2500 | 0.4642 | 0.0151  |
| Extend_Classification Tree  | 0.6207 | 0.7097 | 0.4615 | 0.5804 | 0.1720  |
| FP_kNN                      | 0.6552 | 0.7097 | 0.5577 | 0.6683 | 0.2634  |
| FP_SVM                      | 0.6276 | 0.8817 | 0.1731 | 0.6337 | 0.0762  |
| FP_Random Forest            | 0.6552 | 0.8065 | 0.3846 | 0.6827 | 0.2084  |
| FP_Naive Bayes              | 0.5517 | 0.7419 | 0.2115 | 0.4844 | -0.0521 |
| FP_Classification Tree      | 0.6276 | 0.7097 | 0.4808 | 0.5734 | 0.1904  |
| MACCS_kNN                   | 0.6414 | 0.7742 | 0.4038 | 0.6536 | 0.1882  |
| MACCS_SVM                   | 0.6621 | 0.8710 | 0.2885 | 0.6420 | 0.1964  |

|                             |        |        |        |        |         |
|-----------------------------|--------|--------|--------|--------|---------|
| MACCS_Random Forest         | 0.6621 | 0.8387 | 0.3462 | 0.6308 | 0.2115  |
| MACCS_Naive Bayes           | 0.5379 | 0.6774 | 0.2885 | 0.5167 | -0.0354 |
| MACCS_Classification Tree   | 0.6621 | 0.7957 | 0.4231 | 0.6048 | 0.2330  |
| Pubchem_kNN                 | 0.6483 | 0.8065 | 0.3654 | 0.6798 | 0.1890  |
| Pubchem_SVM                 | 0.6276 | 0.8602 | 0.2115 | 0.5860 | 0.0926  |
| Pubchem_Random Forest       | 0.6414 | 0.8280 | 0.3077 | 0.6094 | 0.1569  |
| Pubchem_Naive Bayes         | 0.4966 | 0.6129 | 0.2885 | 0.4711 | -0.0991 |
| Pubchem_Classification Tree | 0.6552 | 0.7849 | 0.4231 | 0.5699 | 0.2199  |
| SubFP_kNN                   | 0.6552 | 0.7634 | 0.4615 | 0.6469 | 0.2318  |
| SubFP_SVM                   | 0.6483 | 0.8387 | 0.3077 | 0.6610 | 0.1713  |
| SubFP_Random Forest         | 0.6828 | 0.8495 | 0.3846 | 0.6857 | 0.2650  |
| SubFP_Naive Bayes           | 0.6138 | 0.7634 | 0.3462 | 0.5719 | 0.1176  |
| SubFP_Classification Tree   | 0.7103 | 0.8495 | 0.4615 | 0.6889 | 0.3392  |
| Threshold=100 mgkgday       |        |        |        |        |         |
| Model                       | Q      | SE     | SP     | AUC    | MCC     |
| Estate_kNN                  | 0.6621 | 0.8495 | 0.3269 | 0.6474 | 0.2063  |
| Estate_SVM                  | 0.6897 | 0.9677 | 0.1923 | 0.6524 | 0.2687  |
| Estate_Random Forest        | 0.6414 | 0.9570 | 0.0769 | 0.6666 | 0.0712  |
| Estate_Naive Bayes          | 0.6138 | 0.8495 | 0.1923 | 0.6455 | 0.0539  |
| Estate_Classification Tree  | 0.6828 | 0.9140 | 0.2692 | 0.5999 | 0.2449  |
| Extend_kNN                  | 0.6621 | 0.8172 | 0.3846 | 0.6608 | 0.2220  |
| Extend_SVM                  | 0.6345 | 0.9462 | 0.0769 | 0.5905 | 0.0460  |
| Extend_Random Forest        | 0.5931 | 0.8817 | 0.0769 | 0.5679 | -0.0651 |
| Extend_Naive Bayes          | 0.5655 | 0.7742 | 0.1923 | 0.4272 | -0.0392 |
| Extend_Classification Tree  | 0.6345 | 0.8387 | 0.2692 | 0.5842 | 0.1294  |
| FP_kNN                      | 0.6345 | 0.8065 | 0.3269 | 0.6441 | 0.1495  |
| FP_SVM                      | 0.6276 | 0.9247 | 0.0962 | 0.6283 | 0.0364  |
| FP_Random Forest            | 0.6552 | 0.9892 | 0.0577 | 0.6010 | 0.1374  |
| FP_Naive Bayes              | 0.5655 | 0.7742 | 0.1923 | 0.4434 | -0.0392 |
| FP_Classification Tree      | 0.5724 | 0.7849 | 0.1923 | 0.4704 | -0.0269 |
| MACCS_kNN                   | 0.6552 | 0.8710 | 0.2692 | 0.6112 | 0.1753  |
| MACCS_SVM                   | 0.6483 | 0.9032 | 0.1923 | 0.6183 | 0.1358  |
| MACCS_Random Forest         | 0.6276 | 0.9140 | 0.1154 | 0.6714 | 0.0477  |
| MACCS_Naive Bayes           | 0.5448 | 0.7204 | 0.2308 | 0.4944 | -0.0532 |
| MACCS_Classification Tree   | 0.5793 | 0.7849 | 0.2115 | 0.4773 | -0.0041 |
| Pubchem_kNN                 | 0.6414 | 0.8710 | 0.2308 | 0.6641 | 0.1313  |
| Pubchem_SVM                 | 0.6483 | 0.9462 | 0.1154 | 0.5773 | 0.1116  |
| Pubchem_Random Forest       | 0.6207 | 0.9032 | 0.1154 | 0.5701 | 0.0293  |
| Pubchem_Naive Bayes         | 0.5241 | 0.6989 | 0.2115 | 0.4815 | -0.0968 |
| Pubchem_Classification Tree | 0.6138 | 0.8387 | 0.2115 | 0.5693 | 0.0628  |
| SubFP_kNN                   | 0.6690 | 0.8602 | 0.3269 | 0.6295 | 0.2216  |
| SubFP_SVM                   | 0.6828 | 0.9570 | 0.1923 | 0.6308 | 0.2424  |

|                           |        |        |        |        |        |
|---------------------------|--------|--------|--------|--------|--------|
| SubFP_Random Forest       | 0.6345 | 0.9032 | 0.1538 | 0.5949 | 0.0851 |
| SubFP_Naive Bayes         | 0.6552 | 0.8602 | 0.2885 | 0.6532 | 0.1806 |
| SubFP_Classification Tree | 0.6759 | 0.8925 | 0.2885 | 0.7093 | 0.2297 |
